1 High-fat diet suppresses the positive effect of creatine supplementation on skeletal  
2 muscle function by reducing protein expression of IGF-PI3K-AKT-mTOR pathway.

3

4 Renato Ferretti<sup>1\*¶</sup>, Eliezer Guimarães Moura<sup>2&</sup>, Veridiana Carvalho dos Santos<sup>1&</sup>,  
5 Eduardo José Caldeira<sup>3</sup>, Marcelo Conte<sup>4</sup>, Cintia Yuri Matsumura<sup>1</sup>, Adriana Pertille<sup>5</sup>,  
6 Matias Mosqueira<sup>6\*¶</sup>

7

8 <sup>1</sup> Department of Anatomy, Institute of Bioscience of Botucatu, São Paulo State  
9 University - UNESP, Botucatu, São Paulo, Brazil.

10 <sup>2</sup> Laboratory of Physical Activity, Metabolism and Health, Centro Universitario  
11 Adventista de Sao Paulo, Hortolandia, São Paulo, Brazil.

12 <sup>3</sup> Department of Morphology and Basic Pathology, Faculty of Medicine of Jundiai -  
13 FMJ, Jundiai, São Paulo, Brazil.

14 <sup>4</sup> Escola Superior de Educação Física - ESEF, Jundiai, São Paulo, Brazil.

15 <sup>5</sup> Laboratory of Neuromuscular Plasticity, Graduate Program in Science of Human  
16 Movement, Universidade Metodista de Piracicaba, Piracicaba, São Paulo, Brazil.

17 <sup>6</sup> Medical Biophysics Laboratory, Institute of Physiology and Pathophysiology,  
18 Heidelberg University Hospital, Heidelberg, Germany.

19

20 \*Corresponding Authors:

21 [rferretti@ibb.unesp.br](mailto:rferretti@ibb.unesp.br) (RF)

22 [matias@physiologie.uni-heidelberg.de](mailto:matias@physiologie.uni-heidelberg.de) (MM)

23

24 ¶ These authors contributed equally to this work.

25 & These authors also contributed equally to this work.

## 26 **Abstract**

27 High-fat (HF) diets in combination with sedentary lifestyle represent one of  
28 the major public health concerns predisposing to obesity and diabetes leading to  
29 skeletal muscle atrophy, decreased fiber diameter and muscle mass with accumulation  
30 of fat tissue resulting in loss of muscle strength. One strategy to overcome the  
31 maleficent effects of HF diet is resistance training, a strategy used to improve muscle  
32 mass, reverting the negative effects on obesity-related changes in skeletal muscle.  
33 Together with resistance training, supplementation with creatine monohydrate (CrM)  
34 in the diet has been used to improve muscle mass and strength. Creatine is a non-  
35 essential amino acid that is directly involved in the cross-bridge cycle providing a  
36 phosphate group to ADP during the initiation of muscle contraction. Besides its  
37 antioxidant and anti-inflammatory effects CrM also upregulates IGF-1 resulting in  
38 hypertrophy with an increase in muscle function. However, it is unknown whether  
39 CrM supplementation during resistance training would revert the negative effects of  
40 high-fat diet on the muscle performance. During 8 weeks we measured muscle  
41 performance to climb a 1.1m and 80° ladder with increasing load on trained rats that  
42 had received standard diet or high-fat diet, supplemented or not with CrM. We  
43 observed that the CrM supplementation up-regulated IGF-1 and phospho-AKT  
44 protein levels, suggesting an activation of the IGF1-PI3K-Akt/PKB-mTOR pathway.  
45 Moreover, despite the CrM supplementation, HF diet down-regulated several proteins  
46 of the IGF1-PI3K-Akt/PKB-mTOR pathway, suggesting that diet lipid content is  
47 crucial to maintain or improve muscle function during resistance training.

48

49

50

## 51 **Introduction**

52 High-fat (HF) diets and sedentary lifestyle represent a public health concern that can  
53 predispose to obesity and diabetes [1], which can lead to skeletal muscle atrophy due  
54 to degradation of muscle fibers, a reduction of fiber type 1 (aerobic metabolism) and  
55 with an increase of the fiber type 2X (glycolic metabolism) [2, 3]. Obesity is further  
56 characterized by the loss of muscle strength, decreased fiber diameter and muscle  
57 mass with accumulation of fat tissue [4]. The skeletal muscle constitutes about 40-  
58 50% of body mass and is the main responsive tissue to insulin-stimulated uptake of  
59 glucose and fatty acids. At the cellular level, HF diets induce mitochondrial  
60 dysfunction leading to insulin resistance and reducing the muscle mass via decreasing  
61 protein levels of the IGF1-PI3K-Akt/PKB-mTOR skeletal muscle growth pathway,  
62 i.e. the insulin receptor substrate 1 (IRS1), phosphoinositide 3-kinase (PI3K), and a  
63 serine-threonine protein kinase (AKT) [5]. Moreover, obesity upregulates myostatin  
64 (GDF-8), a member of the transforming growth factor- $\beta$  (TGF- $\beta$ 1) family, FoxO,  
65 inducible nitric oxide synthase and Csp3; all members of the muscle atrophy pathway  
66 [3, 6]. Although, both anabolic and catabolic pathways are well described, i.e., AKT  
67 inhibits FoxO and myostatin-SMAD 2/3 inhibits AKT [3], the exact regulation of  
68 protein metabolism during obesity is still incompletely characterized [7].

69 Resistance training as one strategic treatment of physical rehabilitation against obesity  
70 results in increased force-generation capacity, improved muscle mass and positive  
71 effects on obesity-related changes in skeletal muscle [8]. This technique increases the  
72 expression of IGF-1, which in the mouse decreases myosin 2B expression and  
73 increases myosin 2X expression, while in humans, there is a downregulation of the  
74 fast 2X myosin and an upregulation of myosin 2A [2].

75 One method to enhance the effectiveness of resistance training is supplementation  
76 with creatine monohydrate (CrM) in the diet. CrM has been used not only for athletes  
77 as an ergogenic aid for improving muscle mass and strength, but also as therapeutic  
78 agent for patients suffering from sarcopenia, muscle wasting and myopathies [9-11].  
79 Creatine is a non-essential amino acid that is synthesized in the liver and kidney or  
80 ingested from the meat or artificial supplements. In the muscle, creatine is found as  
81 free creatine or phosphocreatine, both are directly involved in cross-bridge cycling  
82 providing phosphate groups to ADP during initiation of muscle contraction [11]. CrM  
83 has an antioxidant and an anti-inflammatory effect, reducing lipid peroxidation and  
84 DNA susceptibility to oxidative stress [12-15]. It has also been shown that CrM  
85 upregulates IGF-1 in cultured myotubes [16] and in human skeletal muscle resulting  
86 in hypertrophy with increased muscle function [10, 17, 18]. The precise mechanism  
87 by which CrM upregulates IGF1 and thus the differentiation of myogenic muscle  
88 fibers and hypertrophy remains unknown. The strategy to use CrM supplementation in  
89 obesity associated with hypertrophic response during resistance training has produced  
90 positive results depending on the dosage, duration of the treatment and on the type of  
91 physical training [10]. Therefore, there are still lacunae regarding the effect of CrM  
92 supplement on the muscle performance during resistance training during high-fat diet.  
93 To test this hypothesis, we compared the muscle capacity of trained rats who received  
94 standard or high-fat diet, supplemented with CrM or not to climb a ladder (1.1m high  
95 at 80° incline) with increasing loads during 8 weeks. We observed that the  
96 improvement of muscle performance seen in trained rats receiving standard diet  
97 supplemented with CrM was completely canceled under the HF diet.  
98  
99

## 100 **Materials and methods**

### 101 **Care and use of animals**

102 Forty male Wistar rats (HanUnib; *Rattus norvegicus*) were obtained from the breeding  
103 colony at the State University of Campinas (CEMIB-UNICAMP) and maintained by  
104 our institutional animal care facility. The rats were kept in collective cages (2- 3  
105 animals per cage) at constant temperature ( $21 \pm 2^{\circ}\text{C}$ ), cycles of 12h light/ 12h  
106 darkness and with free access to food and water. All animal procedures were  
107 performed in accordance with the Guide for Care and Use of Laboratory Animals.  
108 The committee of experimental animal approved the protocol CEUA#490/2012.

### 109 **Experimental groups**

110 At the time of the experiments, all animals were 24 weeks of age and were  
111 randomized into the following eight experimental groups according to their diet,  
112 training and creatine supplementation: i) untrained (UT) standard diet (SD), ii)  
113 untrained creatine supplemented (SD-CrM), iii) resistance training (SD-T), iv)  
114 resistance training with creatine supplementation (SD-T-CrM), v) untrained high-fat  
115 diet (HF), vi) untrained HF with creatine supplemented (HF-CrM), vii) HF and  
116 resistance training (HF-T) and viii) HF and resistance training with creatine  
117 supplementation (HF-T-CrM).

### 118 **Diet**

119 The animals from the SD, SD-CrM, SD-T and SD-T-CrM received standard diet  
120 (Nuvital, Nuvilab, Brazil) containing 71g of carbohydrate , 23g of protein , 6g of total  
121 fat and 5g of fiber, totaling 3.8 kcal/g. Eight weeks prior to the beginning of the  
122 experiments and during the eight weeks of experimental procedures, obesity rats  
123 groups (HF, HF-CrM, HF-T and HF-T-CrM) received a high-fat diet (Nuvital,

124 Nuvilab, Brazil) containing 38g of carbohydrate, 15g of protein, 46g of total fat and  
125 5g of fiber, totalling 5.4 kcal/g. Animals had free access to water and chow during the  
126 experimental period. The CrM supplementation was given daily from day 1 until the  
127 last day of the experimental procedure.

## 128 **Resistance-training protocol**

129 At week 15 prior to the beginning of the experiments, the resistance training groups  
130 (SD-T, SD-T-CrM, HF-T and HF-T-CrM) were submitted to climbing sessions three  
131 times per week during 8 weeks, according to Cassilhas and co-workers[19]. The rats  
132 were adapted to climbing a vertical ladder (1.1 x 0.18m, 2cm grid, 80° of inclination)  
133 with weight attached to falcon cylinder clipped to the base of the tail wrapped with  
134 paper hypoallergenic tape (3M<sup>TM</sup> Micropore<sup>TM</sup>). The length of the ladder lead to 8-12  
135 movements per climb. A three-day adaptation was performed one week before the  
136 training session. The climbing training consisted of two introductory climbs, followed  
137 by three full length climbing attempts. First, the animal was placed at the top of the  
138 ladder near the resting area (40x20x20 cm). Rats were motivated to climb by a touch  
139 to the tail with tweezers. Second, rats were positioned in the middle of the ladder and  
140 an external stimulus was applied to encourage climbing. Finally, during the following  
141 three full length climbing attempts, rats climbed from the base of the equipment to the  
142 ladder's top. The rats that refused to climb were excluded. The adaptation climbing  
143 was done using only the body weight. The first training session started two days after  
144 the adaptation period with 50% of the body weight attached to each animal. A series  
145 of 30g weights were added until the maximal load encumbered the rat's capacity to  
146 climb and consisted of four to twelve ladder climbs. After every successful climbing  
147 from the bottom to the ladder's top, the rats were allowed to rest for 120 seconds.  
148 Failure was defined after three non-successful attempts. The maximal carrying load

149 was considered the highest load before the failed attempts. The training session  
150 consisted of four climbs with 50%, 75%, 90% and 100% of the rat's maximal carrying  
151 load. After each fourth climb, additional 30g weights were added until the new  
152 maximal carrying load was determined.

### 153 **Quantitative analysis of training**

154 Maximal carrying load was determined by the total amount of load carried to the top  
155 of the ladder. The total isotonic contraction measured in grams was calculated by  
156 summing the body weight and the weight lifted to the top of the ladder times the  
157 number of repetitions (number of times the rat successfully climbed to the top of the  
158 ladder). Work measured in kilo Joule was calculated multiplying total mass lifted to  
159 the top of the ladder, the length of the ladder (1.1m), gravitational force ( $9.806 \text{ ms}^{-2}$ )  
160 and the ladder's angle ( $\sin 80 = 0.9848$ ).

### 161 **Sample collection and tissue preparation**

162 After the rats rested for 48h after the last climbing session, they were anesthetized  
163 with a mix of ketamine (80 mg/kg of body weight) and xylazine (12 mg/kg of body  
164 weight) and left and right gastrocnemius were rapidly dissected and one was snap  
165 frozen in N-hexane cooled in liquid nitrogen, and stored at  $-80^{\circ}\text{C}$ . The frozen muscles  
166 were transversal cross-sectioned (8- $\mu\text{m}$  thick cryostat sections), and then stained with  
167 hematoxylin-eosin (HE) for histological analysis, where the cross sectional area and  
168 Feret's fiber diameter was calculated using Image J 1.51f software (National Institute  
169 of Health, USA). Fiber sizes from each experimental condition were determined from  
170 5-7 randomly captured images.

### 171 **Determination of protein levels**

172 Muscle samples from the second gastrocnemius of each rat were lysed in assay lysis  
173 buffer containing freshly added protease and phosphatase inhibitors (1% Triton X-100,  
174 100 mM Tris-HCl, pH 7.4, 100 mM sodium pyrophosphate, 100 mM NaF, 10 mM  
175 sodium ortho-vanadium, 10 mM EDTA, 2 mM PMSF, and 10 µg/ml aprotinin). The  
176 samples were centrifuged for 20 min at 11,000 rpm, and the soluble fraction was  
177 resuspended in 50 µl Laemmli loading buffer (2% SDS, 20% glycerol, 0.04 mg/ml  
178 bromophenol blue, 0.12 M Tris-HCl, pH 6.8, and 0.28 M β-mercaptoethanol).  
179 Samples were stored at -80°C until the analysis. The proteins were resolved on 8%–  
180 12% SDS-polyacrylamide gels and transferred to a nitrocellulose membrane. Primary  
181 antibodies were diluted in TBS containing 0.05% Tween (TBS-T). Membranes were  
182 incubated overnight with primary antibodies at 4 °C (S1-Table 1). For secondary  
183 antibody incubation, anti-rabbit or anti-mouse HRP (Promega) were diluted in TBS-T  
184 containing 5% skim milk (S1-Table 1). Results were visualized with enhanced  
185 chemiluminescence (ECL) SuperSignal West Pico Chemiluminescent Substrate kit  
186 (Pierce Biotechnology). For protein loading control, the blots were stripped and re-  
187 probed for glyceraldehyde-3-phosphate dehydrogenase (GAPDH). Band intensities  
188 were quantified using ImageJ 1.38X (National Institute of Health, USA) software.

## 189 **Statistical analysis**

190 All statistical analyses were performed using GraphPad Prism version 6 for Windows,  
191 GraphPad Software, La Jolla California USA, [www.graphpad.com](http://www.graphpad.com). One-way analysis  
192 for variance (ANOVA) was used with a *post hoc* multiple-comparison. Sidak's  
193 multiple comparison test was used on body weight, epididymal fat mass, lean body  
194 mass and protein levels. Multiple unpaired two-tailed Student's t test for pairwise  
195 comparison utilizing Benjamin & Hochberg's method and the FDR (Q) = 5% was  
196 used on Maximal carrying load, total isotonic contraction, work and relative carrying



197 load. Non-parametric one-way ANOVA Kruskal–Wallis test was used on CSA and  
198 Minimal Feret’s diameter. Significance was considered as  $p < 0.05$ .

## 199 **Results**

### 200 **HF diet increases body weight and epididymal fat mass.**

201 The effect of high-fat (HF) diet was evaluated measuring body weight (Fig 1A) and  
202 epididymal fat mass (Fig 1B). Two-way ANOVA showed that there was no  
203 interaction between exercise and diet and no differences within the exercise  
204 parameters; however, the diet parameter was highly significantly different ( $F_{1,31} =$   
205  $82.04$ ;  $p < 0.001$ ). Based on these results, we pairwise compared the effect of diet on  
206 the exercise treatment, observing that in comparison to the standard diet (SD), HF  
207 increased significantly body weight in all four treatments: untrained (UT), trained (T),  
208 diet supplemented with creatine monohydrate (CrM) and the combination of T and  
209 CrM (T-CrM). Next, we evaluated whether this effect was due to an increase in  
210 epididymal fat mass or just a proportional increase of the body (Fig 1A, S1-Table 2).  
211 The two-way ANOVA showed that again diet was the only significant parameter  
212 ( $F_{1,33} = 186.5$ ;  $p < 0.001$ ). Once more, the post-hoc pairwise comparison between SD  
213 and HF diets showed that the increase of the epididymal fat mass was independent of  
214 the exercise treatment (Fig 1B, S1-Table 3).

215 **Figure 1. Effect of high-fat diet on the body mass of rats.** A. Comparison between  
216 standard diet (SD, (blue) and the administration of a high-fat diet (HF; red) on rat’s  
217 body weight (g) in untrained (UT) rats, trained (T) rats, with creatine monohydrate  
218 supplementation (CrM) and in trained rats with CrM supplementation (T-CrM). B.  
219 The effect of HF diet on the rat’s epididymal fat mass (g) in comparison to SD after  
220 UT, T, CrM and T-CrM treatments. Response of the rat’s lean body mass (g) on HF

221 diet in comparison to SD under UT, T, CrM and T-CrM treatments. n= five rats in  
222 each group; \* p< 0.05; \*\* p< 0.01; \*\*\* p< 0.001.

223 **CrM supplementation improves muscle performance in**  
224 **trained rats.**

225 Since diet has the major effect on the previous evaluated parameters and knowing the  
226 benefits of CrM supplementation of muscle performance, we evaluated whether CrM  
227 supplementation is able to change muscle performance overriding the dietary effect  
228 on trained rats. In order to measure the dietary effect on muscle performance over  
229 time and reducing the number of animals necessary to measure muscle performance,  
230 we measured *in vivo* the capacity of the rat to climb a 1.1 m high ladder at 80 °  
231 inclination with increasing load with intervals of 120s in between each climb  
232 (material & methods). The experimental procedure was performed three times per  
233 week during 8 weeks. Considering the rats needed to adapt to the new environment  
234 and exercise (ladder), only trained rats were used. The data was then averaged per  
235 week and physiological and anatomical parameters were analyzed (Fig 2). The  
236 maximal capacity to carry a total load attached to the rat's tail was measured as  
237 maximal carrying load, in which CrM supplementation significantly increased the  
238 maximal carrying load from the second week in comparison to SD-T alone. (Fig 2A,  
239 S1-Table 4). We considered the activity of climbing a ladder a similar mechanism to  
240 measuring isotonic contractions *in vitro*, with the advantage that here we were able to  
241 measure in the whole animal and not only in one single muscle. Therefore, we  
242 calculated the total isotonic force in terms of total mass (body weight plus load  
243 weight) in grams that the trained rat successfully carried to the top of the ladder. The  
244 analysis showed that, in comparison to SD-T alone, CrM supplementation  
245 significantly improved the total isotonic force from the second week of the

246 experimental procedure and it lasted until week eight (Fig 2B, S1-Table 5). Next we  
247 evaluated whether the SD-T in combination with CrM supplementation would modify  
248 the work performed by the rats to carry up its own body weight plus an increasing  
249 load to the top of the ladder. The supplementation of SD-T rats with CrM  
250 significantly increased the work done only in the first four weeks; from the 5<sup>th</sup> to the  
251 8<sup>th</sup> week, the work was similar to SD (Fig 2C, S1-Table 6). In order to correlate the  
252 change in the muscle physiology observed in trained rats supplemented with CrM, we  
253 dissected the gastrocnemius at the end of the 8<sup>th</sup> week of experiment for anatomical  
254 analyses. First, we observed that the cross-sectional area (CSA) was increased in  
255 trained rats supplemented with CrM (Fig 2D). Finally, we quantified the hypertrophic  
256 effect of CrM on trained rats measuring the distribution of the muscle fiber diameter  
257 using the minimal Feret's diameter' method (Fig 2E).

258 **Figure 2. Carrying capacity, muscle performance and histological analyses on**  
259 **the effect of CrM supplementation (SD-T-CrM; blue-triangle) in comparison to**  
260 **rats without CrM supplementation (SD-T; green-square).** The rats climbed the 1.1  
261 m, 80° inclination ladder with an interval of 120 s rest in between climbing in three  
262 sessions per week during an 8 week-period. After each successful climbing attempt to  
263 the top of the ladder, the carried load was increased in 30-g steps from the starting  
264 load of 50% of the body weight. A. Maximal carrying load is the total load  
265 successfully carried to the top of the ladder. B. Effect of CrM supplementation on  
266 total isotonic contraction. Total isotonic contraction (g) was calculated by summing  
267 the body weight and the total carried load to the top of the ladder times the successful  
268 number of times the rats climbed to the top of the ladder. C. Work performance from  
269 rats receiving CrM supplementation on the climbing task over the 8 weeks of  
270 experimental procedure. D. The gastrocnemius cross-sectional area (CSA,  $\mu\text{m}^2$ ) from

271 each rat was measured at the end of the 8 week-period experiment. E. Consequence of  
272 the distribution of muscle fiber diameter correction by the minimal Feret's diameter  
273 calculation after CrM supplementation. n = 5. \* p< 0.05; \*\* p< 0.01; \*\*\* p< 0.001.

274

275 **High-fat diet cancels the positive effect of CrM**  
276 **supplementation.**

277 After the characterization of the role of CrM diet supplementation on muscle  
278 performance, we evaluated whether this positive effect would be present in trained  
279 rats fed with HF diet. Under HF diet, CrM supplementation did not improve the  
280 maximal carrying load on trained rats (Fig 3A, S1-Table 7). Similarly, the total  
281 isotonic force was not improved with CrM supplemented in the diet (Fig 3B, S1-Table  
282 8). Consequently, work performed by HF-T-CrM rats was also not different to HF-T,  
283 except on 4<sup>th</sup> week, where the HF-T CrM rats had a significant increase in work done  
284 (Fig 3C, S1-Table 9). The CrM-induced hypertrophy observed in SD-T-CrM rats was  
285 absent in rats that received HF-T-CrM in comparison to HF-T rats (Fig 3D). The  
286 analysis of the muscle fiber distribution also showed no difference between HF-T and  
287 HF-T-CrM groups (Fig 3E).

288 **Figure 3. Carrying capacity, muscle performance and histological analyses on**  
289 **the effect of CrM supplementation (HF-T-CrM; red-hexagon) in comparison to**  
290 **rats under HF diet treatment (HF-T; gray-circle). The rats climbed the 1.1 m, 80°**  
291 **inclination ladder with an interval of 120 s rest in between climbing in three sessions**  
292 **per week during an 8 week-period. After each successful climbing attempt to the top**  
293 **of the ladder, the carried load was increased in 30-g steps from the starting load of**  
294 **50% of the body weight. A. Maximal carrying load is the total load successfully**  
295 **carried to the top of the ladder. B. Effect of CrM supplementation on total isotonic**

296 contraction. Total isotonic contraction (g) was calculated by summing the body  
297 weight and the total carried load to the top of the ladder times the successful number  
298 of times the rats climbed to the top of the ladder. C. Work performance from rats  
299 receiving CrM supplementation on the climbing task over the 8 weeks of  
300 experimental procedure. D. The gastrocnemius cross-sectional area (CSA,  $\mu\text{m}^2$ ) from  
301 each rat was measured at the end of the 8 week-period experiment. E. Consequence of  
302 the distribution of muscle fiber diameter correction by the minimal Feret's diameter  
303 calculation after CrM supplementation. n = 5. \* p< 0.05; \*\* p< 0.01; \*\*\* p< 0.001.

304

### 305 **Effect of HF diet on muscle performance.**

306 Once the role of CrM supplementation was characterized within the dietary effect, we  
307 compared the outcome in muscle physiology and anatomy between SD and HF diets  
308 in trained rats. Although HF-T rats were able to carry significantly more load from the  
309 second week in comparison to SD-T rats (Fig 4A), this effect was absent upon  
310 normalization of carrying load to the body weight in the first five weeks and the effect  
311 was even significantly reversed from the 6<sup>th</sup> to the 8<sup>th</sup> week of the experiment (Fig  
312 4B). The total isotonic force was significant higher in HF-T rats in comparison to SD-  
313 T rats (Fig 4C); however, this difference was absent once the total isotonic force was  
314 normalized by the body weight (Fig 4D). The analyses of work (Fig 4E) and work  
315 normalized by body weight (Fig 4F) showed that there is no difference between SD-T  
316 and HF-T groups.

317 **Figure 4. Comparison of the diet's effect on muscle performance between SD-T**  
318 **rats (green-square) and HF-T rats (grey-circle).** A. Maximal carrying load (g). B.  
319 Carrying load normalized to body weight (g/g). C. Total isotonic contraction (g). D.

320 Total isotonic contraction normalized to body weight (g/g). E. Work (KJ). F, Work  
321 normalized to body weight (KJ/g). n = 5. \* p< 0.05; \*\* p< 0.01; \*\*\* p< 0.001.

322

### 323 **Positive role of CrM supplementation is diet-dependent.**

324 CrM supplementation is already known to have ergogenic effects on skeletal muscles;  
325 therefore, we investigated whether CrM would improve the muscle performance in  
326 HF- rats in comparison to SD-T CrM rats. Although there was no difference in  
327 maximal carrying load between SD-T-CrM and HF-T-CrM rats (Fig 5A), we  
328 observed that from the 2<sup>nd</sup> until the 8<sup>th</sup> week of training, muscle performance in SD-T-  
329 CrM rats was significantly improved once the maximal carrying load was normalized  
330 by the body weight (Fig 5B). Although the analyses of total isotonic force (Fig 5C),  
331 total isotonic force normalized by the body weight (Fig 5D), work (Fig 5E) and work  
332 normalized by the body weight (Fig 5F) showed that SD-T CrM rats had better  
333 performance, but this was not significant in comparison to HF-T-CrM rats.

334 **Figure 5. Comparison of the CrM supplementation effect on muscle performance**  
335 **between SD-T rats (blue-triangle) and HF-T rats (red-circle).** A. Maximal  
336 carrying load (g). B. Carrying load normalized to body weight (g/g). C. Total isotonic  
337 contraction (g). D. Total isotonic contraction normalized to body weight (g/g). E.  
338 Work (KJ). F, Work normalized to body weight (KJ/g). n = 5. \* p< 0.05; \*\* p< 0.01.

339

### 340 **Dysregulation of the IGF-PI3K-AKT-mTOR signaling** 341 **pathway in HF-T rats.**

342 The data presented above suggested that CrM improved muscle performance, CSA  
343 and distribution of fiber diameter in trained rats fed with SD, but this effect was

344 absent in trained rats fed with HF diet. Thus, we hypothesized that the main muscle  
345 synthesis pathway, the IGF-PI3K-AKT-mTOR signaling pathway would be enhanced  
346 in SD-T-CrM rats in comparison to SD-T rats and this effect would be reduced in rats  
347 fed with HF diet. Using gastrocnemius muscle samples, we quantified the normalized  
348 protein level of IGF, observing that trained rats fed with SD and supplemented with  
349 CrM significantly increased IGF level in comparison to SD-T rats, but HF  
350 significantly reduced IGF levels in both HF-T and HF-T-CrM rats (Fig 6A). Next, we  
351 quantified the protein level of  $\beta$  IGF receptor subunits, and as observed for IGF, SD-  
352 T-CrM rats showed a significant increase in comparison to SD-T rats (Fig 6B); Again,  
353 HF diet reduced protein levels of  $\beta$  IGF receptor subunits in comparison to SD-T rats.  
354 The HF-T-CrM also showed a non-significant reduction in IGFR levels in comparison  
355 to SD-T-CrM (Fig 6B). As the insulin receptor substrate 1 (IRS1) is the next step of  
356 the muscle synthesis pathway, the protein level analysis showed that subunit  $\beta$  did not  
357 change in rats receiving SD, but in comparison to SD-T rats, it was significantly  
358 reduced in rats fed with HF diet (Fig 6C). We next evaluated whether CrM would  
359 modify protein levels of PI3K; although CrM did not change the protein levels under  
360 SD-T treatment, HF-T significantly reduced the PI3K protein levels in comparison to  
361 SD-T. We analyzed protein levels of AKT, one of the key elements of the pathway, as  
362 total AKT, phosphorylated AKT and the ratio of total and phosphorylated AKT.  
363 Although the normalized to GAPDH protein levels of total and phosphorylated AKT  
364 were not different among the groups (data not shown), there was a significant  
365 difference between the ratio between the phosphorylated AKT normalized to GAPDH  
366 (phospho-AKT/GAPDH) and the total AKT normalized to GAPDH (Total  
367 AKT/GPADH). While phospho-AKT/Total AKT was significantly higher in SD-T-  
368 CrM in comparison to SD-T rats, it was significantly lower in HF-T-CrM rats in

369 comparison to SD-T-CrM rats (Fig 6E). Analyzing the effect of diet and CrM at the  
370 mTOR protein level, we observed that there was no difference in total mTOR  
371 normalized to GAPDH among the treatments (Fig 6F); however, HF-T treatment  
372 significantly reduced the normalized protein levels of phosphorylated mTOR in  
373 comparison to SD-T and in HF-T-CrM in comparison to SD-T-CrM (Fig 6G). This  
374 tendency was also observed in the ratio between phosphorylated mTOR and total  
375 mTOR (Fig 6H). Finally, we analyzed the role of HF diet at the protein levels of S6K,  
376 one of the final effectors of the pathway, showing that only HF-T-CrM significantly  
377 reduced the protein levels in comparison to SD-T-CrM (Fig 6I). The above results  
378 suggested that CrM supplementation in standard diet might overexpress the ergogenic  
379 IGF1 pathway, but HF diet significantly reduced the beneficial effect of CrM.

380 **Figure 6. Immunoblotting analyzes of protein expression of IGF-1-PI3K-AKT-**  
381 **mTOR pathway from gastrocnemius muscle.** The protein levels of GAPDH shown  
382 at the bottom of each immunoblot were used to normalize by the protein levels of  
383 each immunoblot shown at the top. Three independent experiments are shown and  
384 separated according to the treatment, indicated with a color-coded bar; green  
385 represents SD-T group, blue represents SD-T-CrM group, grey represents HF-T group  
386 and red represents HF-T-CrM group. A. IGF-1. B. IGF-1 receptor  $\beta$  subunit. C. IRS1  
387  $\beta$  subunit. D. PI3K. E. Phosphorylated AKT. F. Total mTOR. G. Phosphorylated  
388 mTOR. H. Ratio phosphorylated mTOR to total mTOR. I. S6K. n = 3. \* p < 0.05 vs  
389 SD-T; ¶ p < 0.05 vs. SD-T; ¶¶¶ \*\* p < 0.001 vs. SD-T; # p < 0.05 vs. SD-T-CrM; ## p <  
390 0.01 vs. SD-T-CrM; #### p < 0.001 vs. SD-T-CrM; & p < 0.05 vs. HF-T-CrM.

391

## 392 Discussion



393 Using resistance ladder-climbing training as a model to measure muscle performance,  
394 we showed that HF diet impairs muscle performance by inhibiting protein expression  
395 of the IGF1-IRS1-PI3K-AKT-mTOR pathway. In comparison to SD this effect was  
396 not rescued with the supplementation of CrM in the diet. We observed that HF diet  
397 was the main factor of increased body weight, mainly due to a significant increase of  
398 epididymal fat mass, instead of other possible factors, such as lack of exercise or CrM  
399 supplementation only. Therefore, we focused our study on the effect of diet (SD vs  
400 HF diet) and evaluated how CrM would improve the muscle performance under  
401 different diets. Instead of using a high number of animals for the analyses of muscle  
402 performance *in vitro*, we used the strategy to train the rats to the resistance ladder-  
403 climbing training model (1.1 m, 80° of inclination, 120s of rest in between climbing)  
404 carrying progressively increasing loads (30g increases starting from 50% of body  
405 weight). The progress of the treatment in each rat was measured and analyzed over 8  
406 weeks, thus reducing the number of animals required for the statistical analyses. The  
407 parameters analyzed were maximal carrying load, total isotonic force and work,  
408 providing a complete outcome of CrM supplementation on the diet over the rat's  
409 general fitness. During the eight weeks of resistance ladder-climbing training, we  
410 observed that CrM supplementation to SD significantly increased the rat's capacity to  
411 climb the ladder with increasing load (Fig 2). This increase was associated with  
412 muscular hypertrophy (Fig 2D and 2E). This result was supported by protein level  
413 analyses showing that CrM supplementation on SD increased IGF and phosphorylated  
414 AKT (Fig 6). Conversely, under HF diet CrM supplementation was not able to  
415 improve muscle performance measured as maximal carrying load, total isotonic force  
416 and work under HF diet, without the expected muscle hypertrophic effect (Fig 3) due  
417 to inhibition of protein expression of IGF1-IRS1-PI3K-AKT-mTOR pathway. All

418 together, these results suggested that HF is the major negative effect on muscle  
419 performance measured by the resistance ladder-climbing training model attributable  
420 to inhibition of exercise- and CrM supplementation- mediated muscle protein  
421 synthesis.

## 422 **CrM supplementation improves muscle performance under** 423 **SD.**

424 Creatine monohydrate (CrM) supplementation is the most common nutritional  
425 supplement used by athletes in combination with resistance exercise and more  
426 recently in elderly patients to avoid sarcopenia [20, 21]. Creatine can be obtained  
427 from meat, but also can be synthesized in the body from arginine, glycine and  
428 methionine and its main function as phosphocreatine, is to buffer adenosine  
429 triphosphate levels in the muscle improving and enhancing muscle performance  
430 during exercise [22, 23]. In a recent meta-analysis, it has been shown that CrM  
431 supplementation during resistance training increased lean tissue mass by ca. 1.4kg  
432 resulting in a significant increase in force in comparison to placebo [24]. The possible  
433 mechanism that creatine increases muscle mass and force is increasing the expression  
434 of insulin-like growth factor-1 (IGF-1) [16, 25], which would activate the key  
435 elements of protein synthesis of the IGF1-IRS1-PI3K-AKT-mTOR pathway [17, 26,  
436 27]. The resultant increase of IGF-1 via creatine is also observable in the significantly  
437 increased expression of several myogenic regulatory factors, such as Myo-D, Myf-5  
438 and MRF-4 (Luo 2004), which are responsible for synchronized triggering of  
439 satellite cell activation, proliferation and differentiation (Zanou 2013). This positive  
440 effect of creatine on muscle is probably only observable together with exercise [28-  
441 30].

442 We observed that rats under standard diet in combination with training and CrM  
443 supplementation significantly increased maximal carrying load, total isotonic force  
444 and work in comparison to the SD-T rat group. We also observed that the SD-T-CrM  
445 group had significantly higher gastrocnemius CSA, with a shift to the right on the  
446 minimal Feret's diameter (Fig 2). These results support previous reports showing that  
447 CrM is responsible to improve the effects of resistance training on muscle  
448 performance via the IGF1-IRS1-PI3K-AKT-mTOR pathway.

449 **The positive effect of resistance training and CrM are**  
450 **inhibited by HF diet.**

451 It has been extensively shown in humans and animal models that long term HF diet  
452 results in an excessive accumulation of adipose tissue in skeletal muscle leading to  
453 muscle atrophy via activation of proteins of the atrophy pathway (TNF $\alpha$ -TNF-R-  
454 NF $\kappa$ B-MuRF-1); as consequence, not only body weight increases but also the  
455 ubiquitin proteasome system, autophagy, and apoptosis pathways are activated [2-4,  
456 31-34]. Another reported consequence of HF diet, is a reduction in muscle diameter,  
457 specific force and thus percentage of muscle strength [4]. It has also been described  
458 that long term HF diet impairs all described benefits of resistance training by reducing  
459 cortical actin filaments, impairing insulin stimulated glucose transport, reducing  
460 matrix metalloproteinases activity and reducing IRS-1 Pi3K kinase activity [35-38].  
461 The main strategy to recover muscle force after HF diet is through resistance training  
462 which causes increased expression of contractile proteins and the muscle glucose  
463 transporter 4. Further, resistance training increases IRS-1 Pi3K kinase activity  
464 resulting in activation of AKT kinase, thus improving muscle performance [36, 37,  
465 39]. Our results support and extend previous findings showing that HF diet  
466 significantly increased body weight and epididymal fat mass. In comparison to SD,

467 our data from the HF group initially suggested an increase of maximal carrying load  
468 and total isotonic force; however, once these parameters were normalized to the body  
469 weight, rats from the SD group were able to carry significantly more load than those  
470 from the HF group, with no difference in total isotonic force (Fig 4). These results are  
471 supported by the inverse relationship between fiber size and loss in force generation  
472 capacity in *in vitro* muscle fibers in obese older mice [40, 41]. Moreover, our protein  
473 level expression analyses suggested that HF diet significantly reduced main targets of  
474 the protein synthesis in almost the entire IGF1-IRS1-PI3K-AKT-mTOR pathway (Fig  
475 6).

476 Differently from what we expected, CrM supplementation was not able to overcome  
477 the negative effect of HF diet on the parameters evaluated here in terms of muscle  
478 performance (Fig 3). Moreover, by comparing SD-T-CrM and HF-T-CrM data  
479 normalized to body weight (Fig 5), we observed that diet has a crucial effect on  
480 muscle performance. Long-term HF diet changes muscle fiber-type and myofibers  
481 inhibiting thus the CrM and resistance training effects on muscle contractile force [41].  
482 Once we evaluated the protein expression, we observed a similar protein expression  
483 of HF-T-CrM in comparison to HF-T group, with the interesting difference that the  
484 HF-CrM group showed significantly reduced protein levels of phospho-AKT and S6K.  
485 The detailed analysis of the protein levels shown in Fig 6 and summarized in Fig 7,  
486 suggested specific action of CrM, HF and HF-CrM in the IGF1-IRS1-PI3K-AKT-  
487 mTOR pathway of trained rats. Interestingly, largely in accordance with previous  
488 reports, CrM did not activate all elements of the IGF1-IRS1-PI3K-AKT-mTOR  
489 pathway, but rather mainly the expression of IGF-1 and, the novelty here, additionally  
490 the expression of phospho-AKT. Conversely, HF diet inhibits the expression of  
491 several proteins of the IGF1-IRS1-PI3K-AKT-mTOR pathway, such as IGF-1

492 receptor, IRS1, PI3K, mTOR, as well as IGF-1, which in turn was activated by CrM.  
493 Impressively, the supplementation of CrM on HF diet did not revert the HF diet-  
494 induced down-regulation, but also included down-regulation of phospho-AKT and  
495 S6K, another two major elements of the IGF1-IRS1-PI3K-AKT-mTOR pathway (Fig  
496 7).

497 **Figure 7. Summary of the effect on the protein levels of the gastrocnemius**  
498 **muscle of the IGF-1-PI3K-AKT-mTOR pathway after 8 weeks of resistance**  
499 **training and receiving CrM, HF or HF-CrM.** Creatine monohydrate  
500 supplementation (CrM) increased the protein levels of IGF1, IGF1-receptor and  
501 phosphorylated AKT. This enhancement of the protein levels promoted by CrM  
502 supplementation would explain the increase of muscle performance. High-fat diet  
503 (HF) and high-fat diet supplemented with CrM (HF-CrM) decreased the protein levels  
504 of IGF1, IRS1, PI3K, phosphorylated mTOR, and HF-CrM also decreased the protein  
505 level of phosphorylated SKT and S6K. The decrease on the protein level of these key  
506 targets of IGF-1-PI3K-AKT-mTOR pathway would explain the reduced muscle  
507 performance.

508

## 509 **Conclusion**

510 We demonstrated the mechanism by which during resistance training CrM increases  
511 muscle size and muscle performance, suggesting a higher activation of muscle protein  
512 synthesis via IGF1-IRS1-PI3K-AKT-mTOR pathway. Conversely, HF diet reduces  
513 muscle size and performance by inhibiting the expression of the same IGF1-IRS1-  
514 PI3K-AKT-mTOR pathway and this effect was not overruled by supplementation of  
515 CrM. These results suggested the necessity to change the diet prior in order to  
516 perceive the benefit of resistance training and CrM supplementation.

517

## 518 **Acknowledgements**

519 Luiz Gustavo de Almeida Chuffa and Luis Antonio Justulin Junior for kindly  
520 providing the antibodies. Bruno Ricardo Santos da Silva for his technical assistance  
521 resistance training protocol and preparation of tissue for histology. Carlos Alberto da  
522 Silva for the access to the ladder-climbing equipment. Ulrike Zeiger for her valuable  
523 comments in the manuscript.

524

## 525 **References**

- 526 1. Mozaffarian D, Katan MB, Ascherio A, Stampfer MJ, Willett WC. Trans fatty  
527 acids and cardiovascular disease. *N Engl J Med*. 2006;354(15):1601-13. doi:  
528 10.1056/NEJMra054035. PubMed PMID: 16611951.
- 529 2. Blaauw B, Schiaffino S, Reggiani C. Mechanisms modulating skeletal  
530 muscle phenotype. *Compr Physiol*. 2013;3(4):1645-87. doi:  
531 10.1002/cphy.c130009. PubMed PMID: 24265241.
- 532 3. Roy B, Curtis ME, Fears LS, Nahashon SN, Fentress HM. Molecular  
533 Mechanisms of Obesity-Induced Osteoporosis and Muscle Atrophy. *Front Physiol*.  
534 2016;7:439. doi: 10.3389/fphys.2016.00439. PubMed PMID: 27746742; PubMed  
535 Central PMCID: PMC5040721.
- 536 4. Abrigo J, Rivera JC, Aravena J, Cabrera D, Simon F, Ezquer F, et al. High Fat  
537 Diet-Induced Skeletal Muscle Wasting Is Decreased by Mesenchymal Stem Cells  
538 Administration: Implications on Oxidative Stress, Ubiquitin Proteasome Pathway  
539 Activation, and Myonuclear Apoptosis. *Oxid Med Cell Longev*.

540 2016;2016:9047821. doi: 10.1155/2016/9047821. PubMed PMID: 27579157;

541 PubMed Central PMCID: PMC4992759.

542 5. Zierath JR, Krook A, Wallberg-Henriksson H. Insulin action and insulin  
543 resistance in human skeletal muscle. *Diabetologia*. 2000;43(7):821-35. doi:  
544 10.1007/s001250051457. PubMed PMID: 10952453.

545 6. McFarlane C, Plummer E, Thomas M, Hennebry A, Ashby M, Ling N, et al.  
546 Myostatin induces cachexia by activating the ubiquitin proteolytic system  
547 through an NF-kappaB-independent, FoxO1-dependent mechanism. *J Cell Physiol*.  
548 2006;209(2):501-14. doi: 10.1002/jcp.20757. PubMed PMID: 16883577.

549 7. Laplante M, Sabatini DM. mTOR signaling in growth control and disease.  
550 *Cell*. 2012;149(2):274-93. doi: 10.1016/j.cell.2012.03.017. PubMed PMID:  
551 22500797; PubMed Central PMCID: PMC3331679.

552 8. Bodine SC, Stitt TN, Gonzalez M, Kline WO, Stover GL, Bauerlein R, et al.  
553 Akt/mTOR pathway is a crucial regulator of skeletal muscle hypertrophy and can  
554 prevent muscle atrophy in vivo. *Nat Cell Biol*. 2001;3(11):1014-9. doi:  
555 10.1038/ncb1101-1014. PubMed PMID: 11715023.

556 9. Davidson ZE, Truby H. A review of nutrition in Duchenne muscular  
557 dystrophy. *J Hum Nutr Diet*. 2009;22(5):383-93. doi: 10.1111/j.1365-  
558 277X.2009.00979.x. PubMed PMID: 19743977.

559 10. Kreider RB. Effects of creatine supplementation on performance and  
560 training adaptations. *Mol Cell Biochem*. 2003;244(1-2):89-94. PubMed PMID:  
561 12701815.

562 11. Moon JH, Choo SR, Kim JS. Relationship between Low Muscle Mass and  
563 Metabolic Syndrome in Elderly People with Normal Body Mass Index. *J Bone*

- 564 Metab. 2015;22(3):99-106. doi: 10.11005/jbm.2015.22.3.99. PubMed PMID:  
565 26389084; PubMed Central PMCID: PMC4572038.
- 566 12. Lawler JM, Barnes WS, Wu G, Song W, Demaree S. Direct antioxidant  
567 properties of creatine. Biochem Biophys Res Commun. 2002;290(1):47-52. doi:  
568 10.1006/bbrc.2001.6164. PubMed PMID: 11779131.
- 569 13. Rahimi R. Creatine supplementation decreases oxidative DNA damage and  
570 lipid peroxidation induced by a single bout of resistance exercise. J Strength  
571 Cond Res. 2011;25(12):3448-55. doi: 10.1519/JSC.0b013e3182162f2b. PubMed  
572 PMID: 22080314.
- 573 14. Santos RV, Bassit RA, Caperuto EC, Costa Rosa LF. The effect of creatine  
574 supplementation upon inflammatory and muscle soreness markers after a 30km  
575 race. Life Sci. 2004;75(16):1917-24. doi: 10.1016/j.lfs.2003.11.036. PubMed  
576 PMID: 15306159.
- 577 15. Young JF, Larsen LB, Malmendal A, Nielsen NC, Straadt IK, Oksbjerg N, et  
578 al. Creatine-induced activation of antioxidative defence in myotube cultures  
579 revealed by explorative NMR-based metabonomics and proteomics. J Int Soc  
580 Sports Nutr. 2010;7(1):9. doi: 10.1186/1550-2783-7-9. PubMed PMID:  
581 20205771; PubMed Central PMCID: PMC2822831.
- 582 16. Louis M, Van Beneden R, Dehoux M, Thissen JP, Francaux M. Creatine  
583 increases IGF-I and myogenic regulatory factor mRNA in C(2)C(12) cells. FEBS  
584 Lett. 2004;557(1-3):243-7. PubMed PMID: 14741375.
- 585 17. Deldicque L, Louis M, Theisen D, Nielens H, Dehoux M, Thissen JP, et al.  
586 Increased IGF mRNA in human skeletal muscle after creatine supplementation.  
587 Med Sci Sports Exerc. 2005;37(5):731-6. PubMed PMID: 15870625.



- 588 18. Volek JS, Ratamess NA, Rubin MR, Gomez AL, French DN, McGuigan MM, et  
589 al. The effects of creatine supplementation on muscular performance and body  
590 composition responses to short-term resistance training overreaching. *Eur J Appl*  
591 *Physiol.* 2004;91(5-6):628-37. doi: 10.1007/s00421-003-1031-z. PubMed PMID:  
592 14685870.
- 593 19. Cassilhas RC, Reis IT, Venâncio D, Fernandes J, Tufik S, Mello MTd. Animal  
594 model for progressive resistance exercise: a detailed description of model and its  
595 implications for basic research in exercise. *Motriz: Revista de Educação Física.*  
596 2013;19:178-84.
- 597 20. Candow DG, Forbes SC, Little JP, Cornish SM, Pinkoski C, Chilibeck PD.  
598 Effect of nutritional interventions and resistance exercise on aging muscle mass  
599 and strength. *Biogerontology.* 2012;13(4):345-58. doi: 10.1007/s10522-012-  
600 9385-4. PubMed PMID: 22684187.
- 601 21. Kreider RB, Kalman DS, Antonio J, Ziegenfuss TN, Wildman R, Collins R, et  
602 al. International Society of Sports Nutrition position stand: safety and efficacy of  
603 creatine supplementation in exercise, sport, and medicine. *J Int Soc Sports Nutr.*  
604 2017;14:18. doi: 10.1186/s12970-017-0173-z. PubMed PMID: 28615996;  
605 PubMed Central PMCID: PMC5469049.
- 606 22. Clark JF. Creatine: a review of its nutritional applications in sport.  
607 *Nutrition.* 1998;14(3):322-4. PubMed PMID: 9583381.
- 608 23. Wyss M, Kaddurah-Daouk R. Creatine and creatinine metabolism. *Physiol*  
609 *Rev.* 2000;80(3):1107-213. doi: 10.1152/physrev.2000.80.3.1107. PubMed  
610 PMID: 10893433.
- 611 24. Chilibeck PD, Kaviani M, Candow DG, Zello GA. Effect of creatine  
612 supplementation during resistance training on lean tissue mass and muscular

- 613 strength in older adults: a meta-analysis. *Open Access J Sports Med.* 2017;8:213-  
614 26. doi: 10.2147/OAJSM.S123529. PubMed PMID: 29138605; PubMed Central  
615 PMCID: PMCPMC5679696.
- 616 25. Burke DG, Candow DG, Chilibeck PD, MacNeil LG, Roy BD, Tarnopolsky MA,  
617 et al. Effect of creatine supplementation and resistance-exercise training on  
618 muscle insulin-like growth factor in young adults. *Int J Sport Nutr Exerc Metab.*  
619 2008;18(4):389-98. PubMed PMID: 18708688.
- 620 26. Deldicque L, Theisen D, Bertrand L, Hespel P, Hue L, Francaux M. Creatine  
621 enhances differentiation of myogenic C2C12 cells by activating both p38 and  
622 Akt/PKB pathways. *Am J Physiol Cell Physiol.* 2007;293(4):C1263-71. doi:  
623 10.1152/ajpcell.00162.2007. PubMed PMID: 17652429.
- 624 27. Fujita S, Dreyer HC, Drummond MJ, Glynn EL, Cadenas JG, Yoshizawa F, et  
625 al. Nutrient signalling in the regulation of human muscle protein synthesis. *J*  
626 *Physiol.* 2007;582(Pt 2):813-23. doi: 10.1113/jphysiol.2007.134593. PubMed  
627 PMID: 17478528; PubMed Central PMCID: PMCPMC2075348.
- 628 28. Deldicque L, Theisen D, Francaux M. Regulation of mTOR by amino acids  
629 and resistance exercise in skeletal muscle. *Eur J Appl Physiol.* 2005;94(1-2):1-10.  
630 doi: 10.1007/s00421-004-1255-6. PubMed PMID: 15702344.
- 631 29. Kirwan JP, del Aguila LF, Hernandez JM, Williamson DL, O'Gorman DJ,  
632 Lewis R, et al. Regular exercise enhances insulin activation of IRS-1-associated  
633 PI3-kinase in human skeletal muscle. *J Appl Physiol (1985).* 2000;88(2):797-803.  
634 doi: 10.1152/jappl.2000.88.2.797. PubMed PMID: 10658053.
- 635 30. Willoughby DS, McFarlin B, Bois C. Interleukin-6 expression after  
636 repeated bouts of eccentric exercise. *Int J Sports Med.* 2003;24(1):15-21. doi:  
637 10.1055/s-2003-37197. PubMed PMID: 12582947.

- 638 31. Ma J, Hwang SJ, McMahon GM, Curhan GC, McLean RR, Murabito JM, et al.  
639 Mid-adulthood cardiometabolic risk factor profiles of sarcopenic obesity. *Obesity*  
640 (Silver Spring). 2016;24(2):526-34. doi: 10.1002/oby.21356. PubMed PMID:  
641 26813531.
- 642 32. Sala D, Ivanova S, Plana N, Ribas V, Duran J, Bach D, et al. Autophagy-  
643 regulating TP53INP2 mediates muscle wasting and is repressed in diabetes. *J*  
644 *Clin Invest*. 2014;124(5):1914-27. doi: 10.1172/JCI72327. PubMed PMID:  
645 24713655; PubMed Central PMCID: PMC4001546.
- 646 33. Shortreed KE, Krause MP, Huang JH, Dhanani D, Moradi J, Ceddia RB, et al.  
647 Muscle-specific adaptations, impaired oxidative capacity and maintenance of  
648 contractile function characterize diet-induced obese mouse skeletal muscle. *PLoS*  
649 *One*. 2009;4(10):e7293. doi: 10.1371/journal.pone.0007293. PubMed PMID:  
650 19806198; PubMed Central PMCID: PMC2752162.
- 651 34. Sishi B, Loos B, Ellis B, Smith W, du Toit EF, Engelbrecht AM. Diet-induced  
652 obesity alters signalling pathways and induces atrophy and apoptosis in skeletal  
653 muscle in a prediabetic rat model. *Exp Physiol*. 2011;96(2):179-93. doi:  
654 10.1113/expphysiol.2010.054189. PubMed PMID: 20952489.
- 655 35. Ambery AG, Tackett L, Penque BA, Brozinick JT, Elmendorf JS. Exercise  
656 training prevents skeletal muscle plasma membrane cholesterol accumulation,  
657 cortical actin filament loss, and insulin resistance in C57BL/6J mice fed a  
658 western-style high-fat diet. *Physiol Rep*. 2017;5(16). doi: 10.14814/phy2.13363.  
659 PubMed PMID: 28811359; PubMed Central PMCID: PMC5582260.
- 660 36. Chibalin AV, Yu M, Ryder JW, Song XM, Galuska D, Krook A, et al. Exercise-  
661 induced changes in expression and activity of proteins involved in insulin signal  
662 transduction in skeletal muscle: differential effects on insulin-receptor

- 663 substrates 1 and 2. Proc Natl Acad Sci U S A. 2000;97(1):38-43. PubMed PMID:  
664 10618367; PubMed Central PMCID: PMCPMC26612.
- 665 37. Krisan AD, Collins DE, Crain AM, Kwong CC, Singh MK, Bernard JR, et al.  
666 Resistance training enhances components of the insulin signaling cascade in  
667 normal and high-fat-fed rodent skeletal muscle. J Appl Physiol (1985).  
668 2004;96(5):1691-700. doi: 10.1152/jappphysiol.01054.2003. PubMed PMID:  
669 14707149.
- 670 38. Souza MV, Leite RD, Souza Lino AD, Marqueti Rde C, Bernardes CF, Araujo  
671 HS, et al. Resistance training improves body composition and increases matrix  
672 metalloproteinase 2 activity in biceps and gastrocnemius muscles of diet-  
673 induced obese rats. Clinics (Sao Paulo). 2014;69(4):265-70. PubMed PMID:  
674 24714835; PubMed Central PMCID: PMCPMC3971365.
- 675 39. Yaspelkis BB, 3rd, Singh MK, Trevino B, Krisan AD, Collins DE. Resistance  
676 training increases glucose uptake and transport in rat skeletal muscle. Acta  
677 Physiol Scand. 2002;175(4):315-23. doi: 10.1046/j.1365-201X.2002.00998.x.  
678 PubMed PMID: 12167170.
- 679 40. Choi SJ, Files DC, Zhang T, Wang ZM, Messi ML, Gregory H, et al.  
680 Intramyocellular Lipid and Impaired Myofiber Contraction in Normal Weight and  
681 Obese Older Adults. J Gerontol A Biol Sci Med Sci. 2016;71(4):557-64. doi:  
682 10.1093/gerona/glv169. PubMed PMID: 26405061; PubMed Central PMCID:  
683 PMCPMC5014190.
- 684 41. Eshima H, Tamura Y, Kakehi S, Kurebayashi N, Murayama T, Nakamura K,  
685 et al. Long-term, but not short-term high-fat diet induces fiber composition  
686 changes and impaired contractile force in mouse fast-twitch skeletal muscle.

687 Physiol Rep. 2017;5(7). doi: 10.14814/phy2.13250. PubMed PMID: 28408640;

688 PubMed Central PMCID: PMC5392533.

689

## 690 **Support information**

691 **S1 Table 1. List of antibodies used on immunoblotting.**

692 **S1 Table 2. Comparison of the effect of standard diet (SD) and high-fat diet (HF)**

693 **on body weight (g) at the end of the 8<sup>th</sup> week of experiment.**

694 **S1 Table 3. Comparison of the effect of standard diet (SD) and high-fat diet (HF)**

695 **on epididymal fat mass (g) at the end of the 8<sup>th</sup> week of experiment.**

696 **S1 Table 4. Summary of the statistical analysis for maximal carrying load (g)**

697 **between SD-T and SD-T-CrM.** The maximal carrying load was calculated from the

698 total amount of load carried to the top of the ladder.

699 **S1 Table 5. Summary of the statistical analysis for total isotonic force (g)**

700 **between SD-T and SD-T-CrM.** The value was calculating the sum of body weight

701 plus maximal carrying load times the successful times the animal climbed the ladder.

702 **S1 Table 6. Summary of the statistical analysis for work (kJ) between SD-T and**

703 **SD-T-CrM.** Work was calculated multiplying total mass lifted to the top of the ladder,

704 the length of the ladder (1.1m), gravitational force ( $9.806 \text{ ms}^{-2}$ ) and the ladder's angle

705 ( $\sin 80 = 0.9848$ ).

706 **S1 Table 7. Summary of the statistical analysis for maximal carrying load (g)**

707 **between HF-T and HF-T-CrM.** The maximal carrying load was calculated from the

708 total amount of load carried to the top of the ladder.

709 **S1 Table 8. Summary of the statistical analysis for total isotonic force (g)**

710 **between HF-T and HF-T-CrM.** The value was calculating the sum of body weight

711 plus maximal carrying load times the successful times the animal climbed the ladder.

712 **S1 Table 9. Summary of the statistical analysis for work (kJ) between HF-T and**

713 **HF-T-CrM.** Work was calculated multiplying total mass lifted to the top of the ladder,

714 the length of the ladder (1.1m), gravitational force ( $9.806 \text{ ms}^{-2}$ ) and the ladder's angle

715 ( $\text{sen}80 = 0.9848$ ).

**A**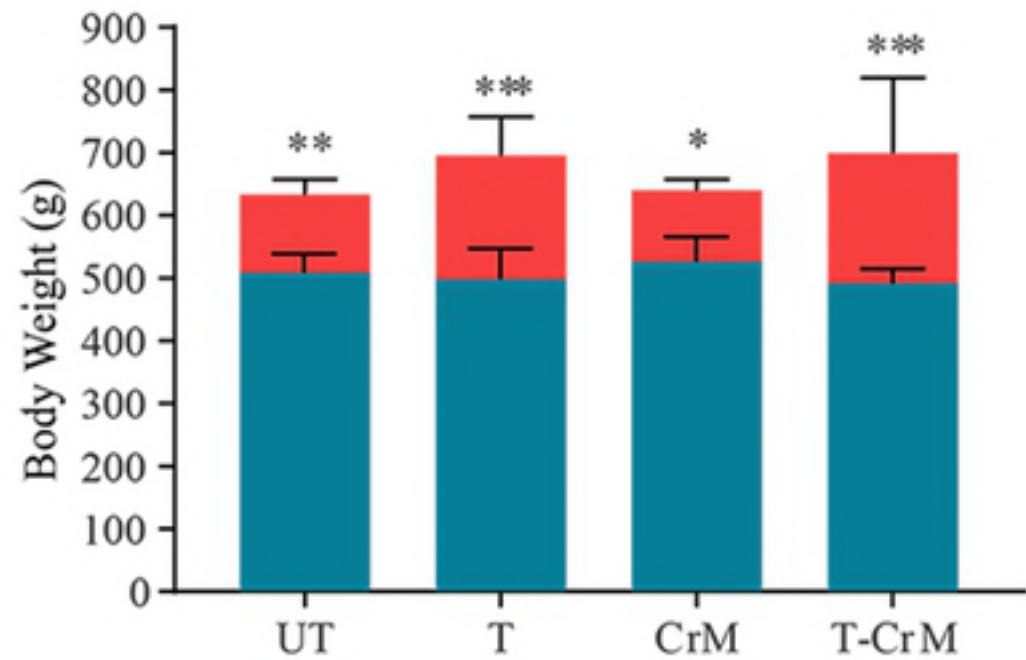**B**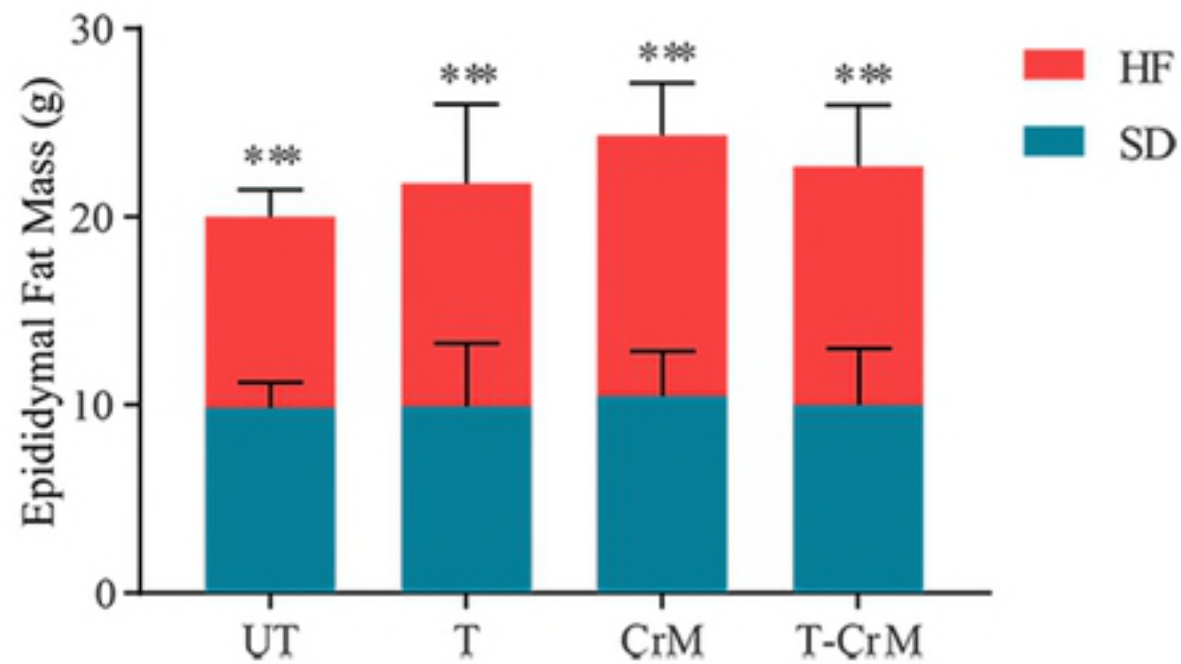

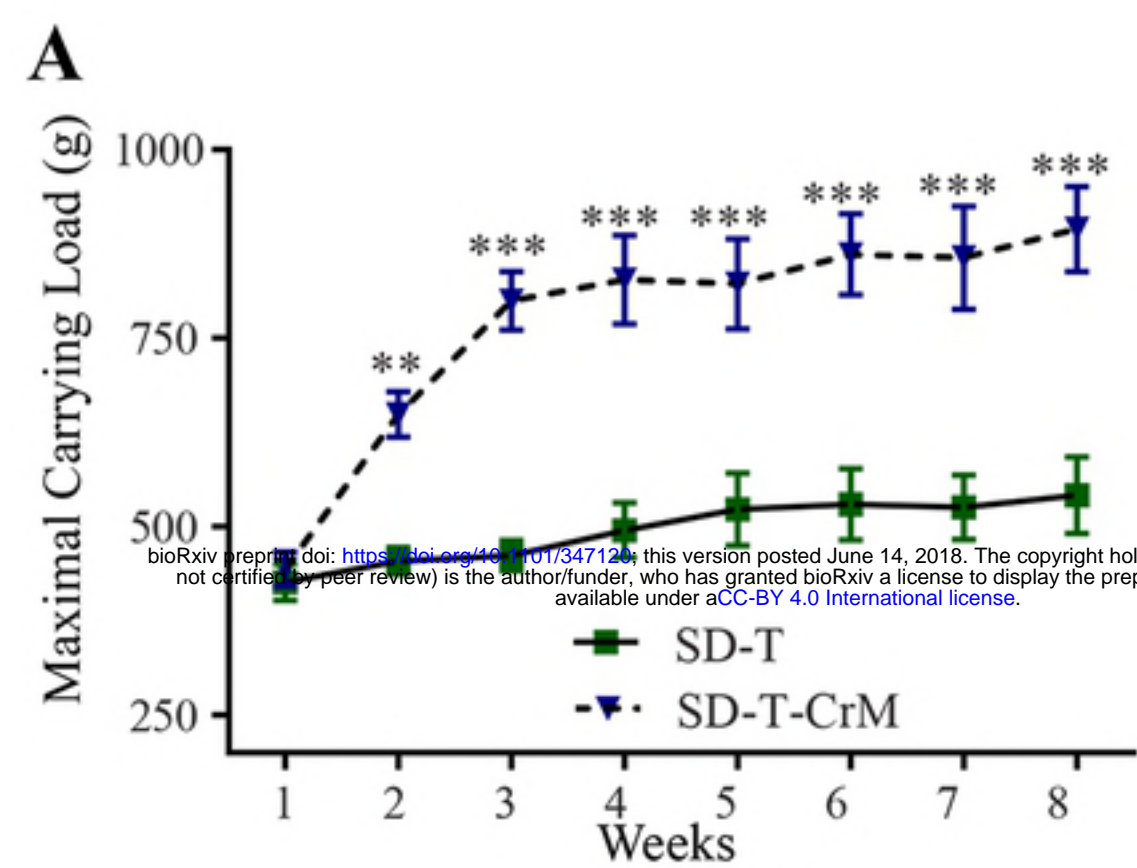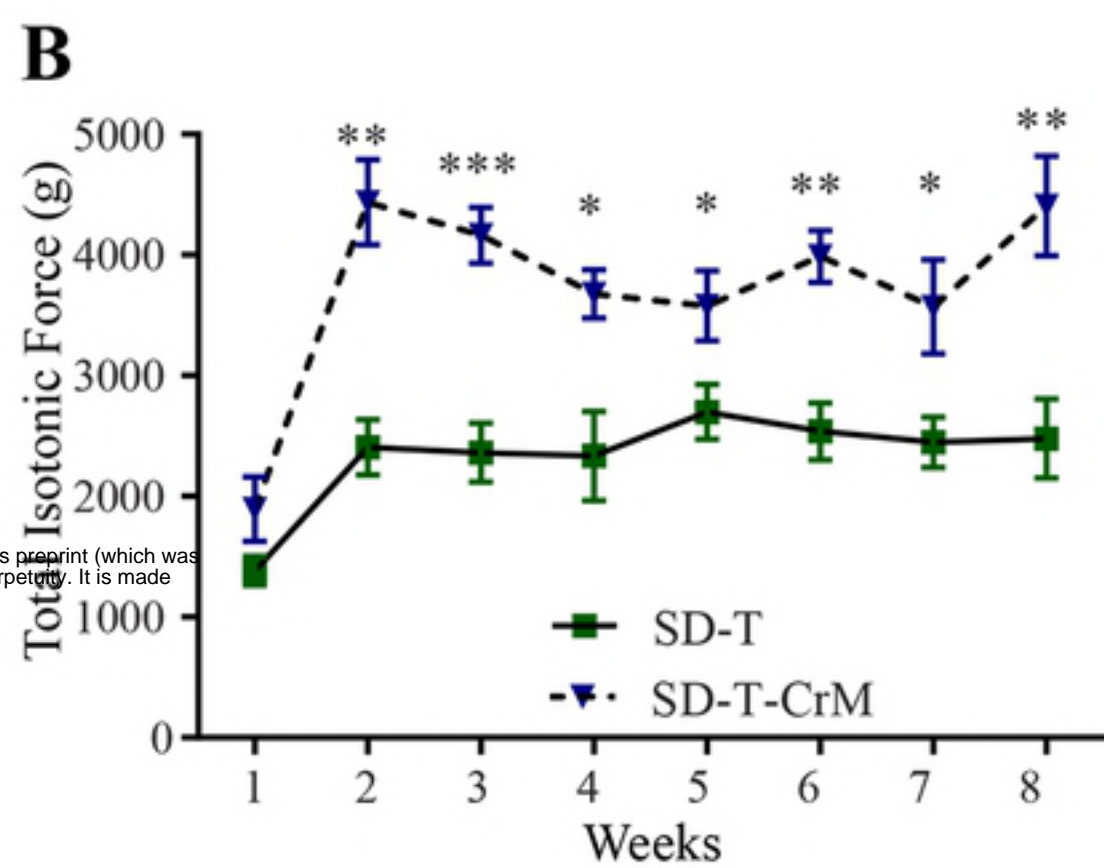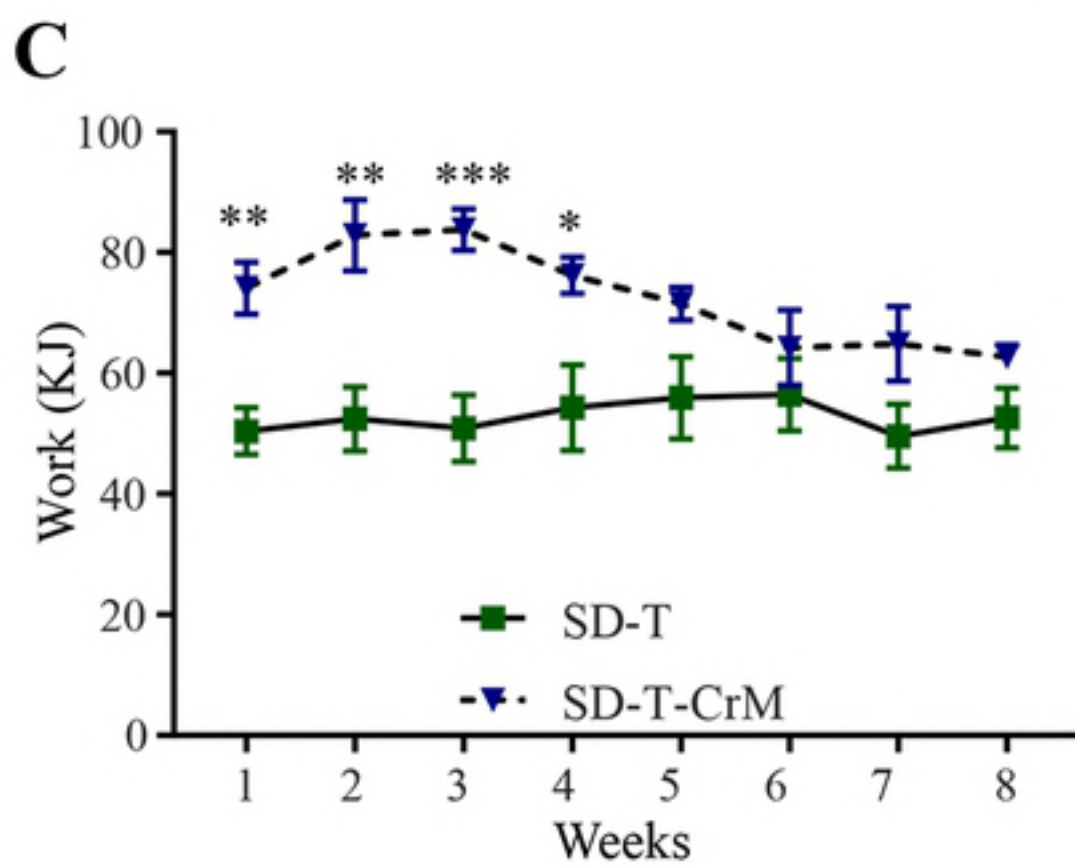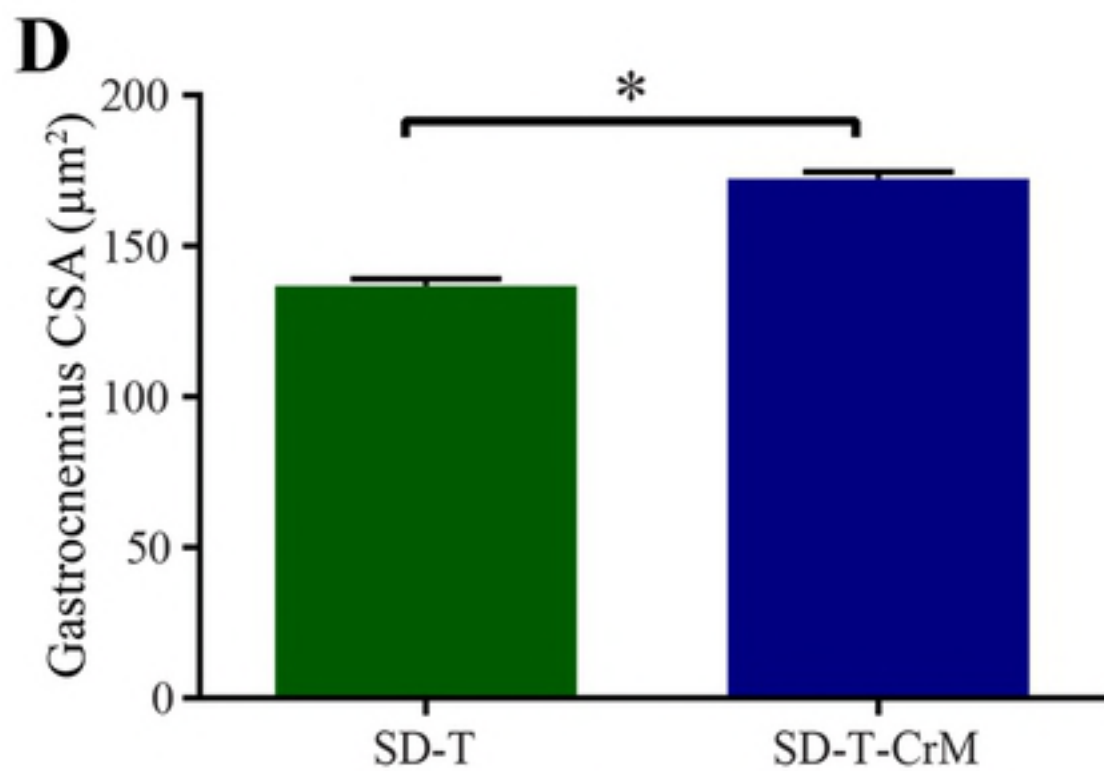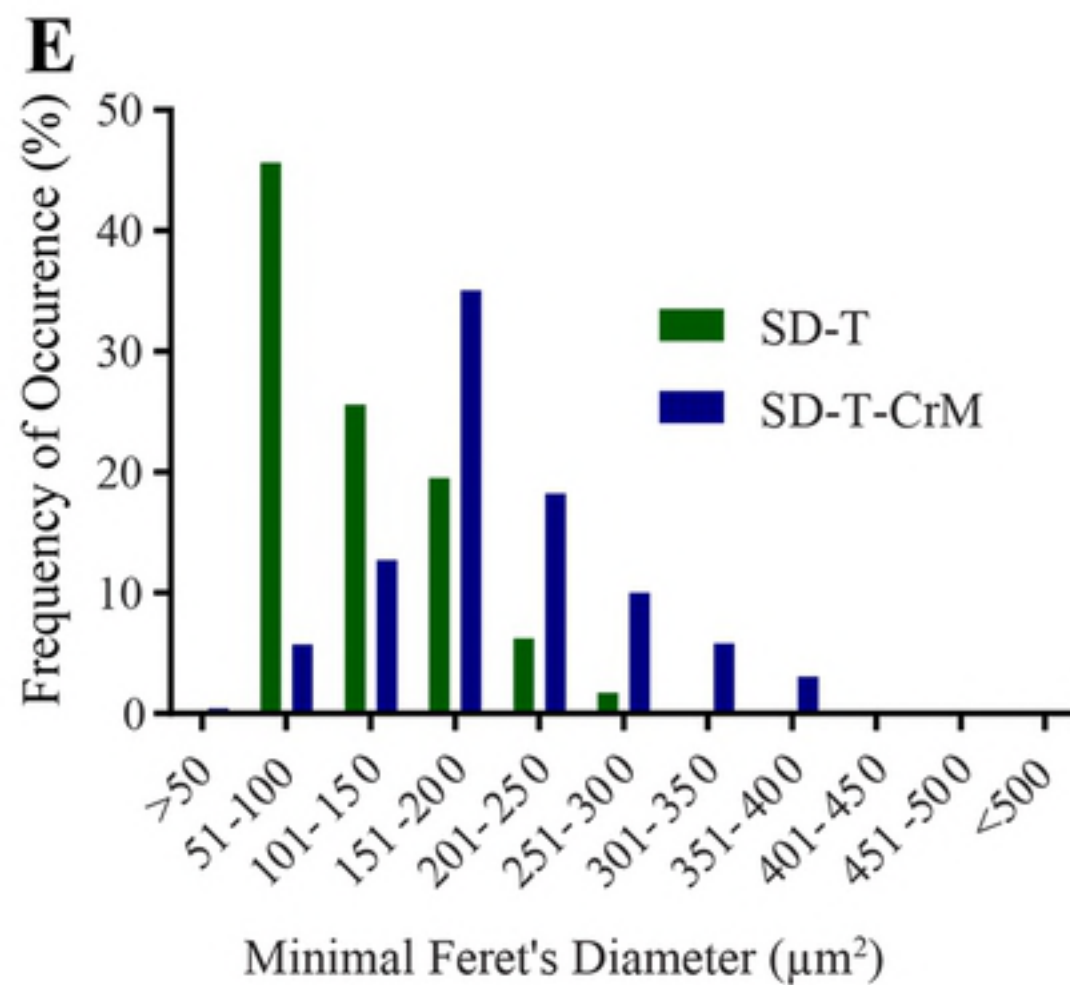



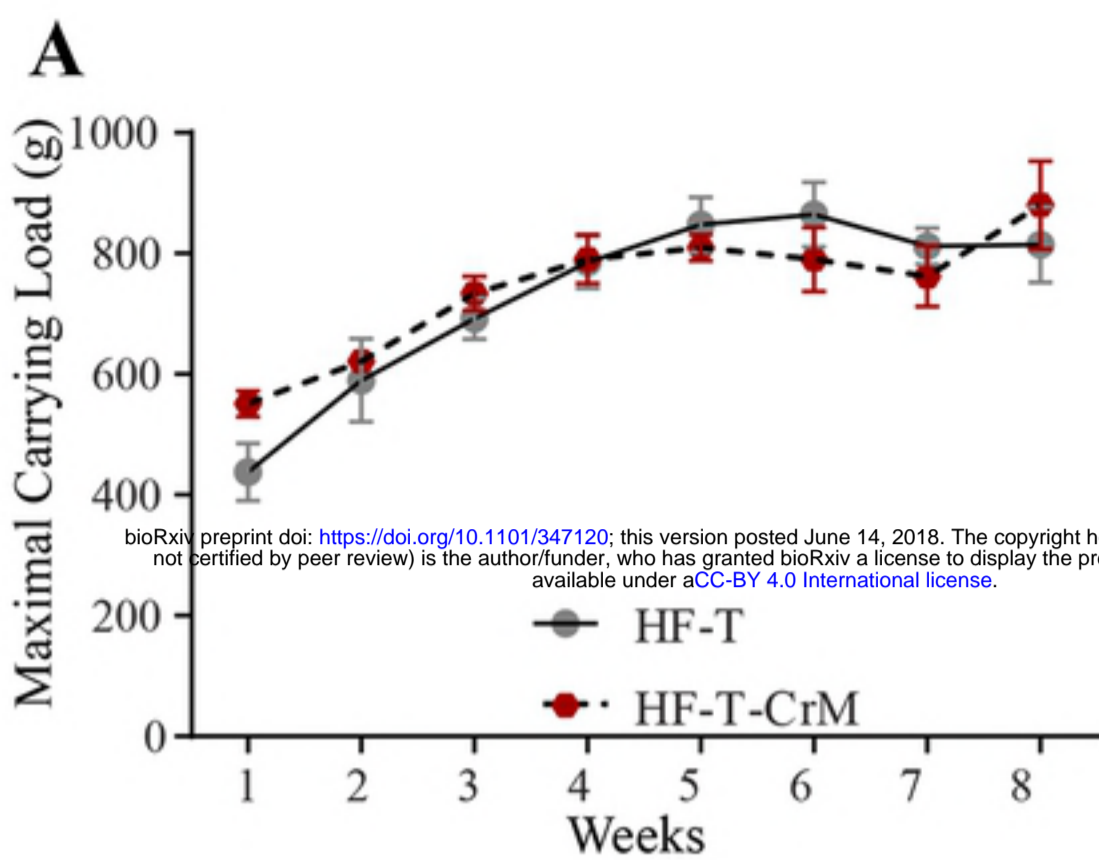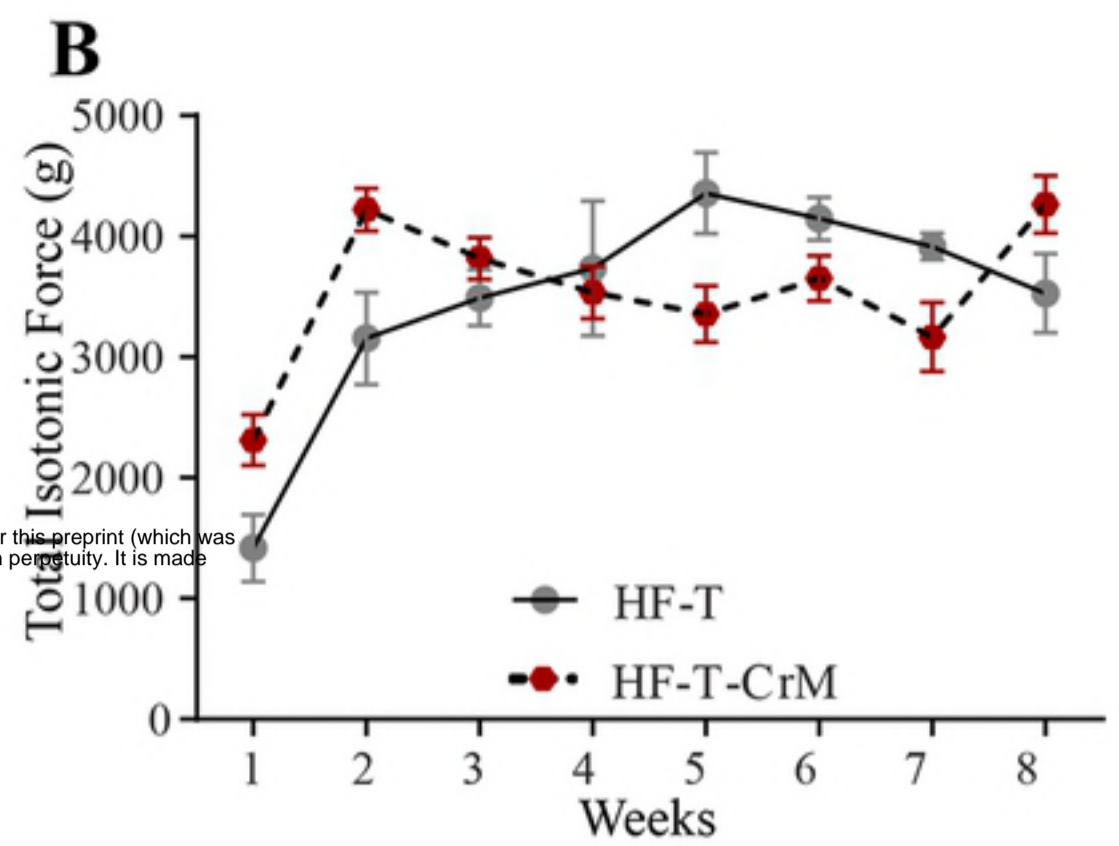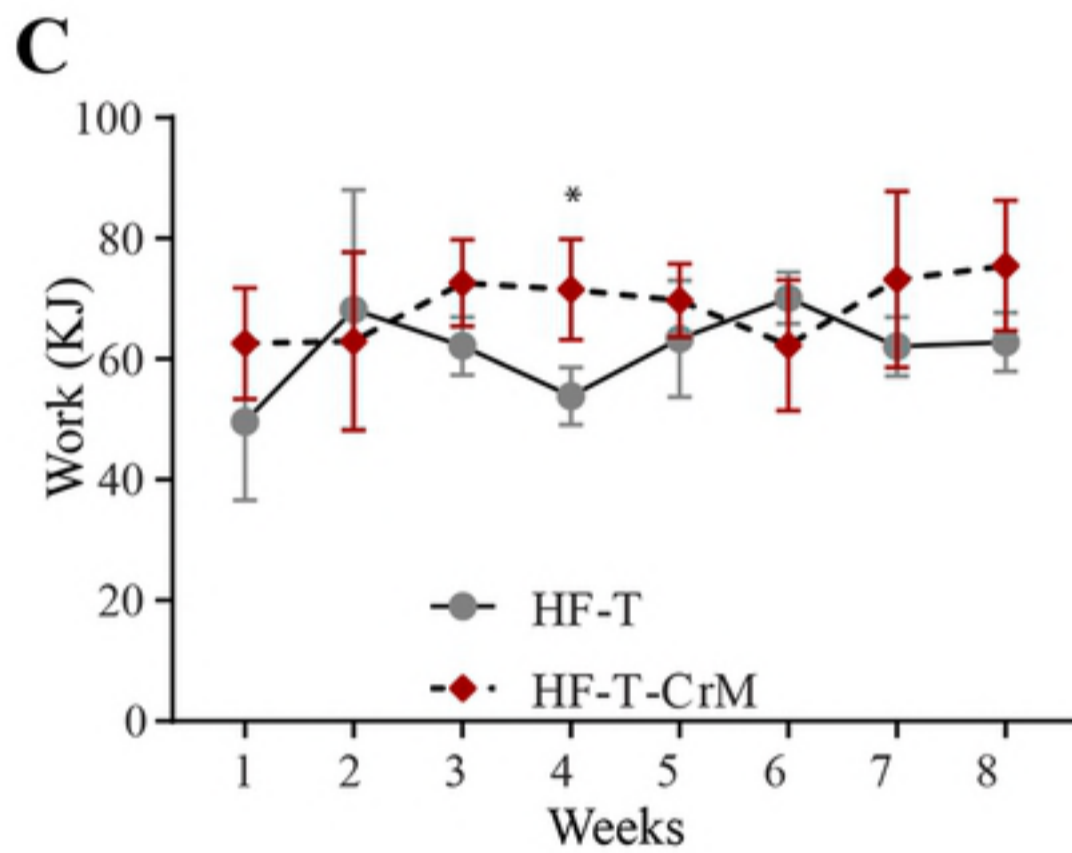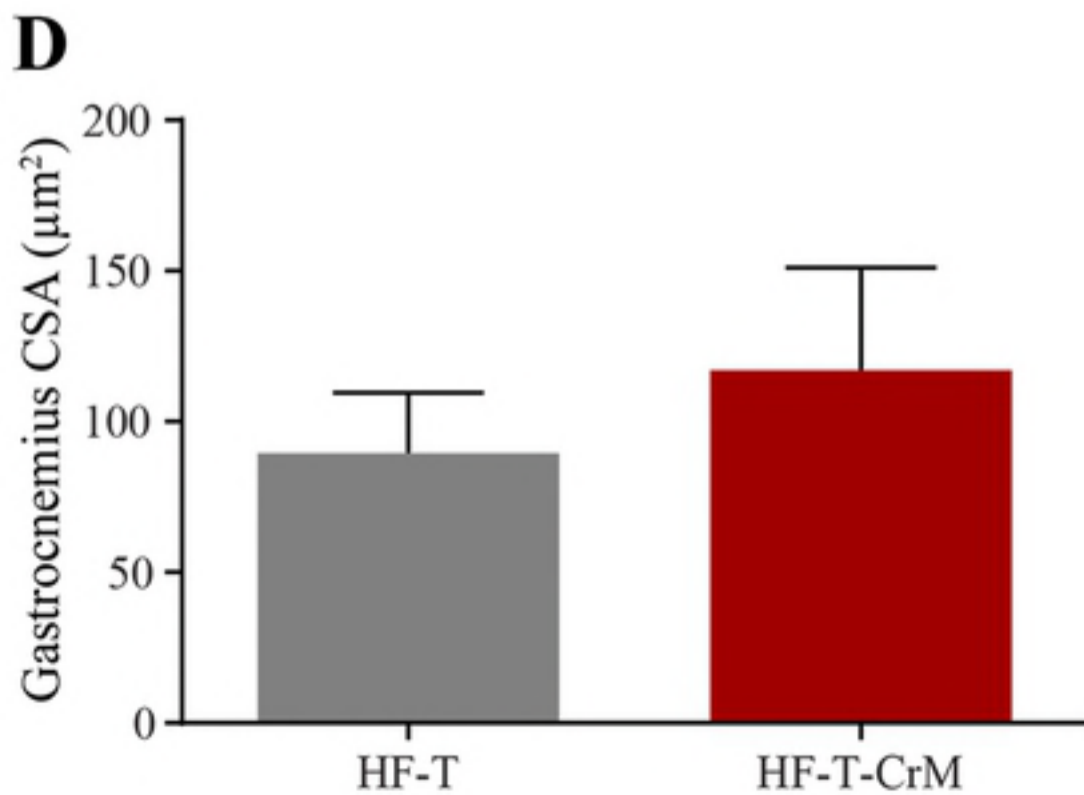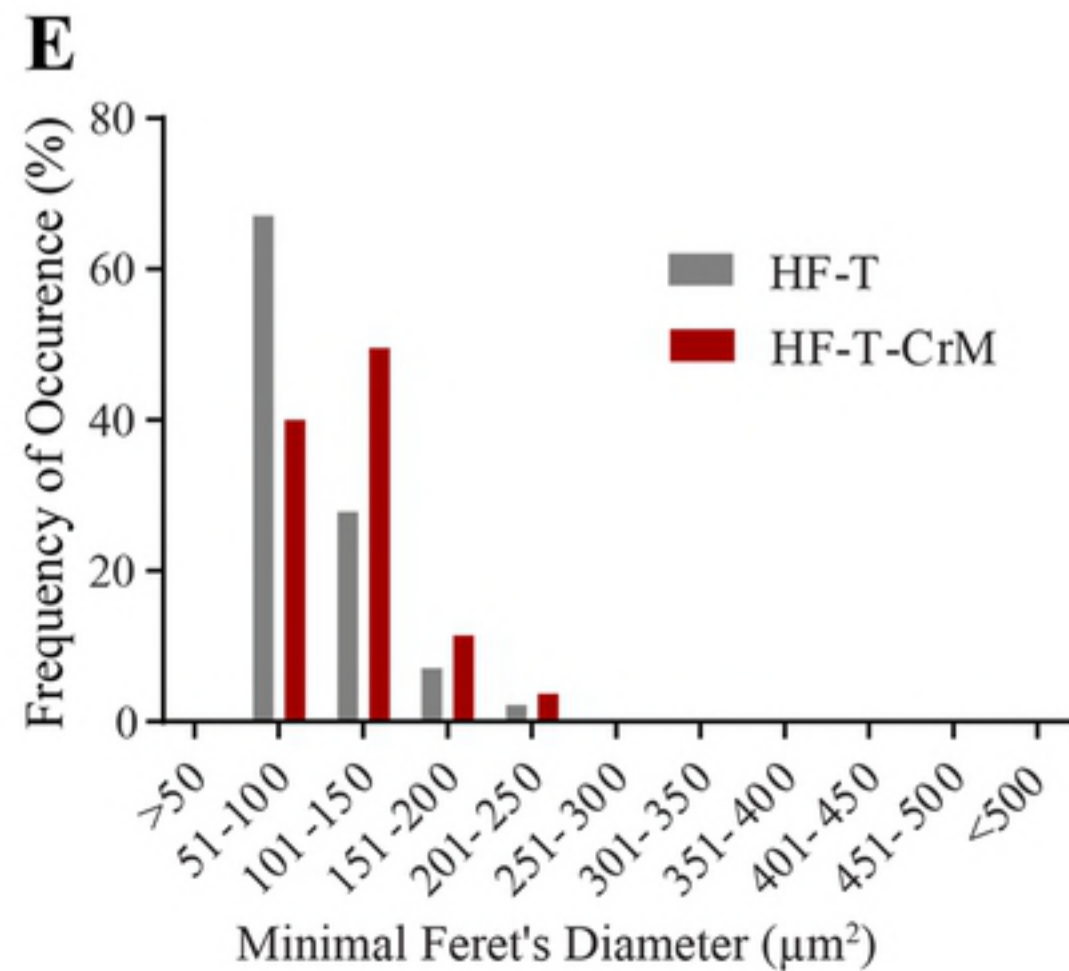

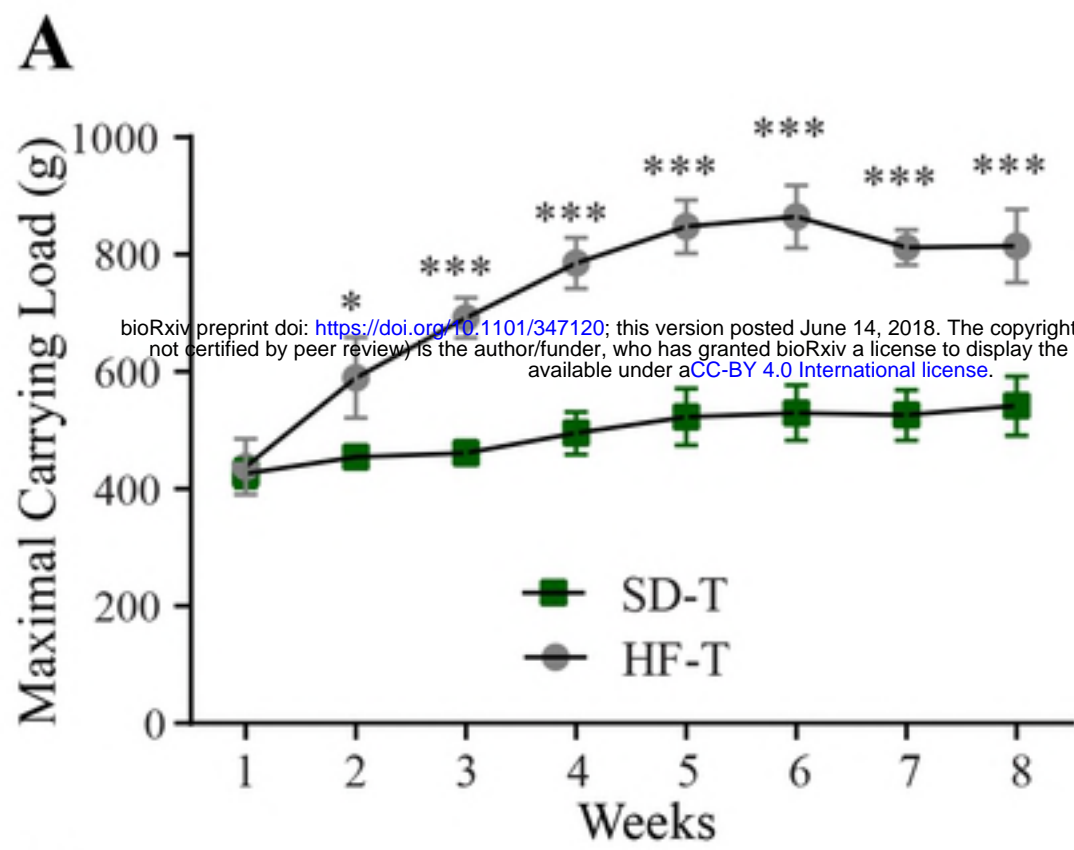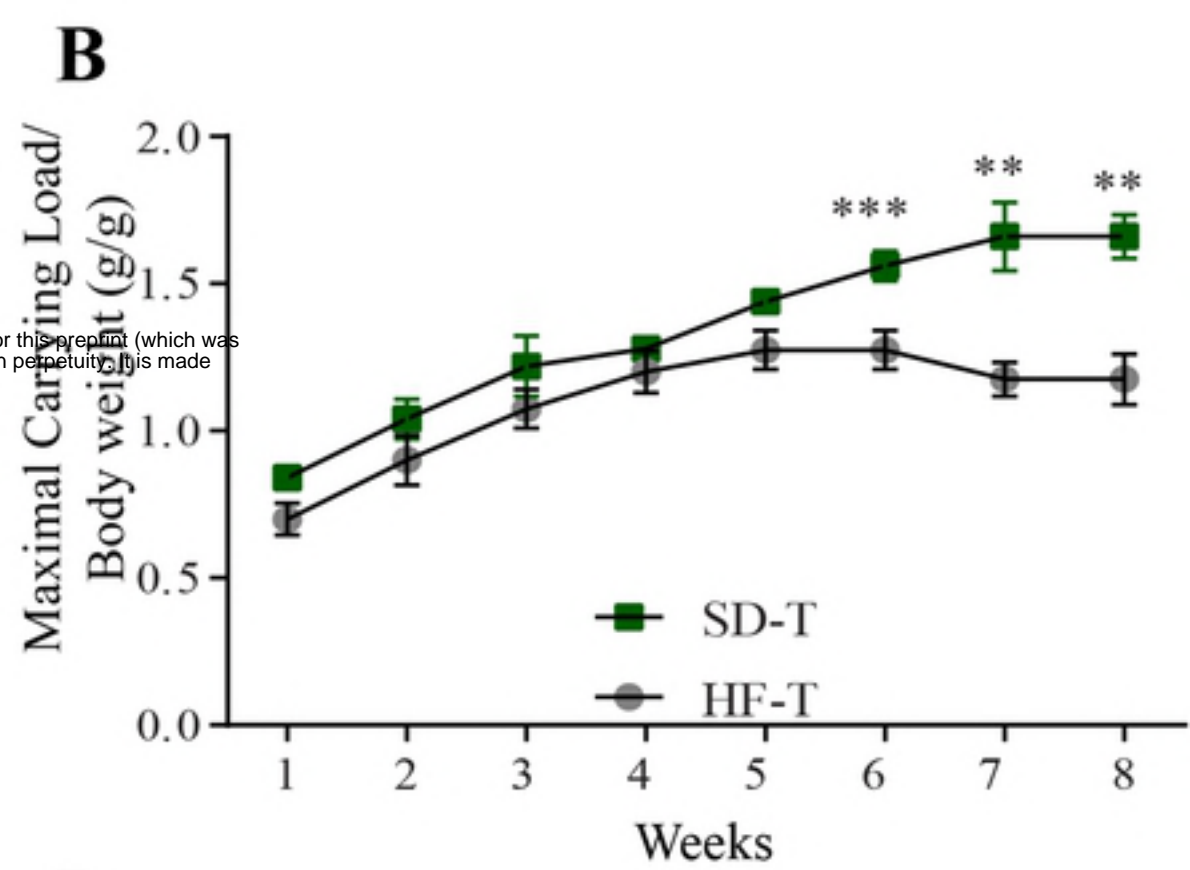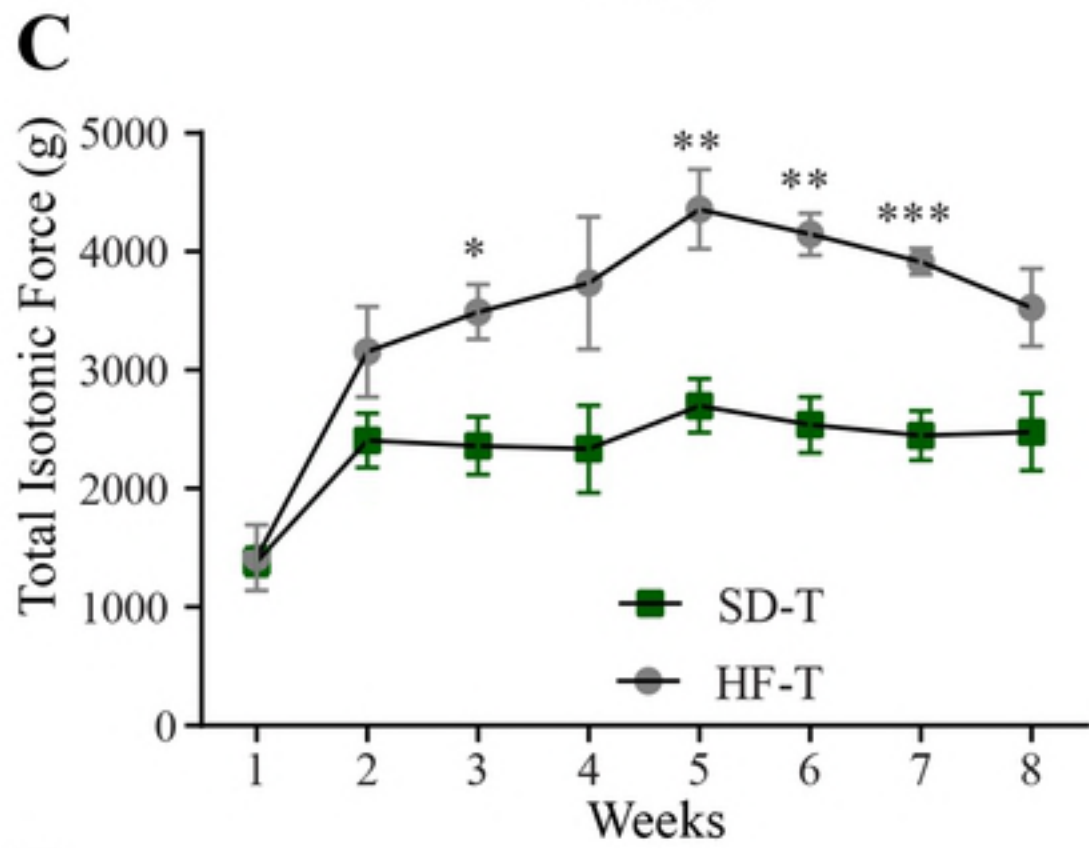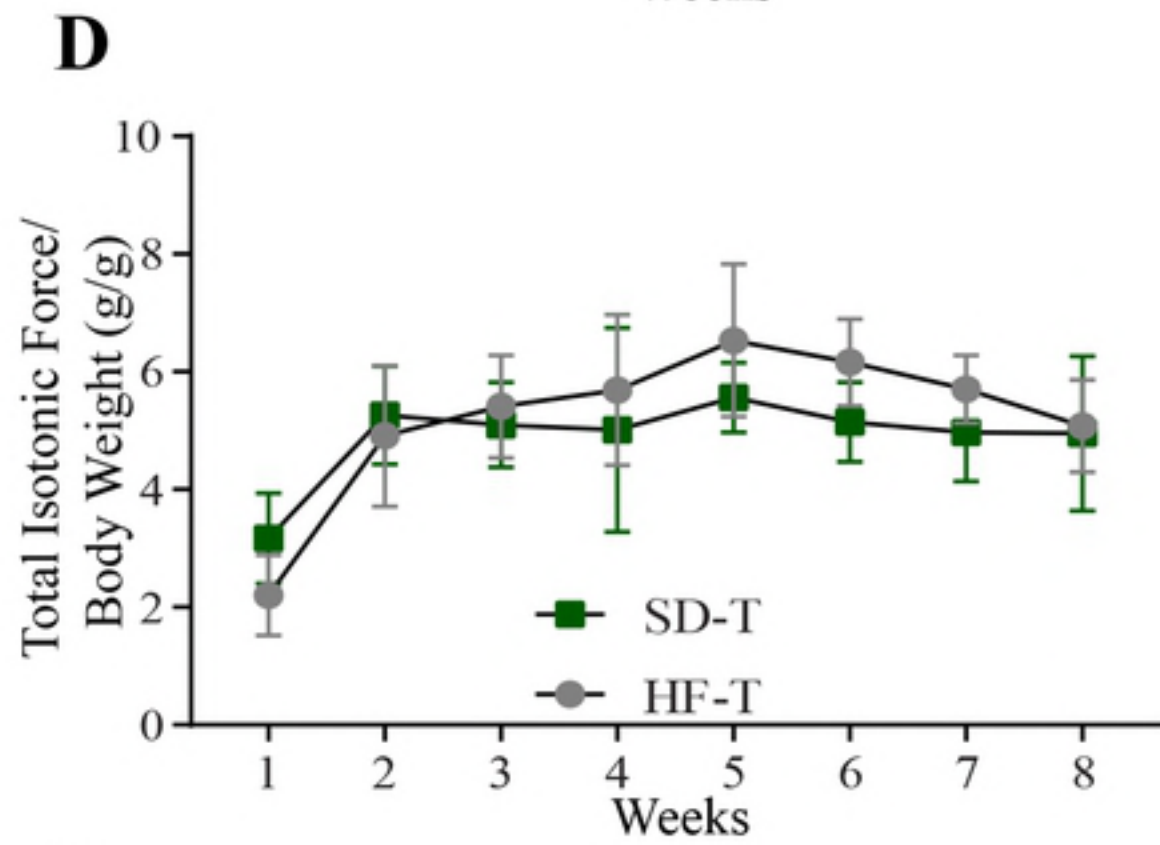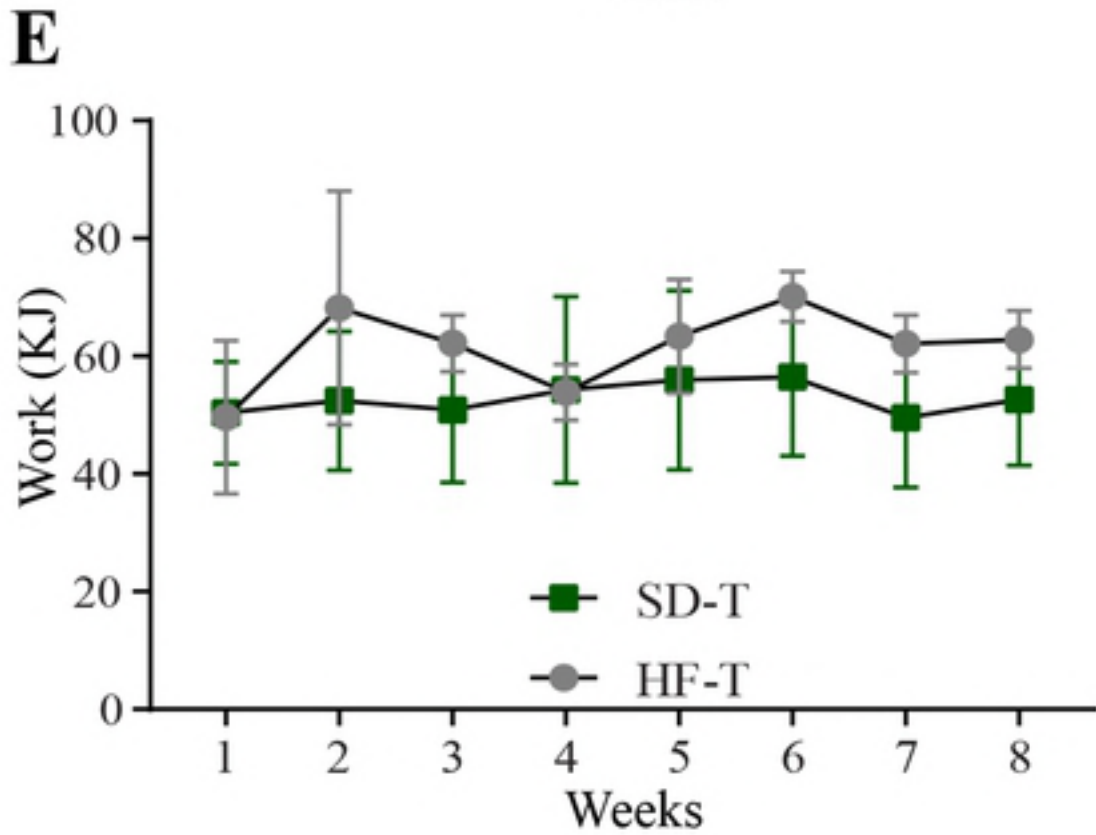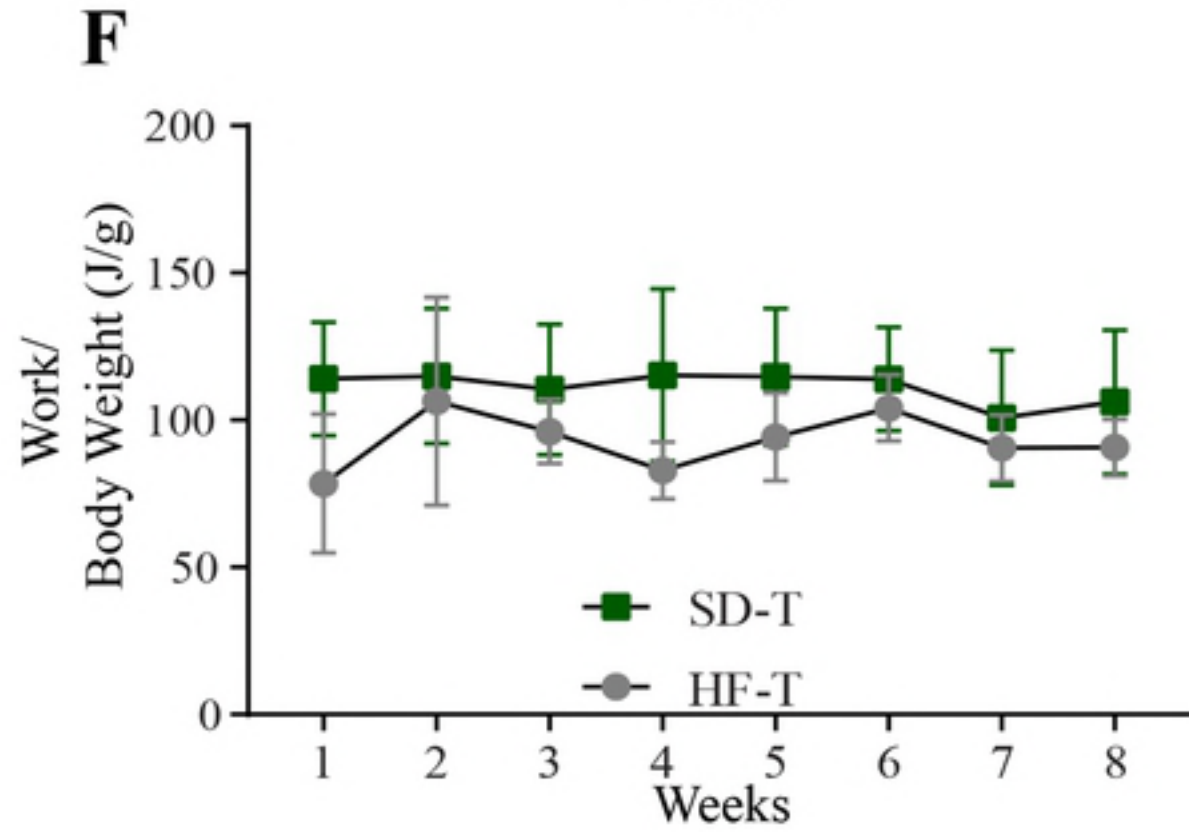

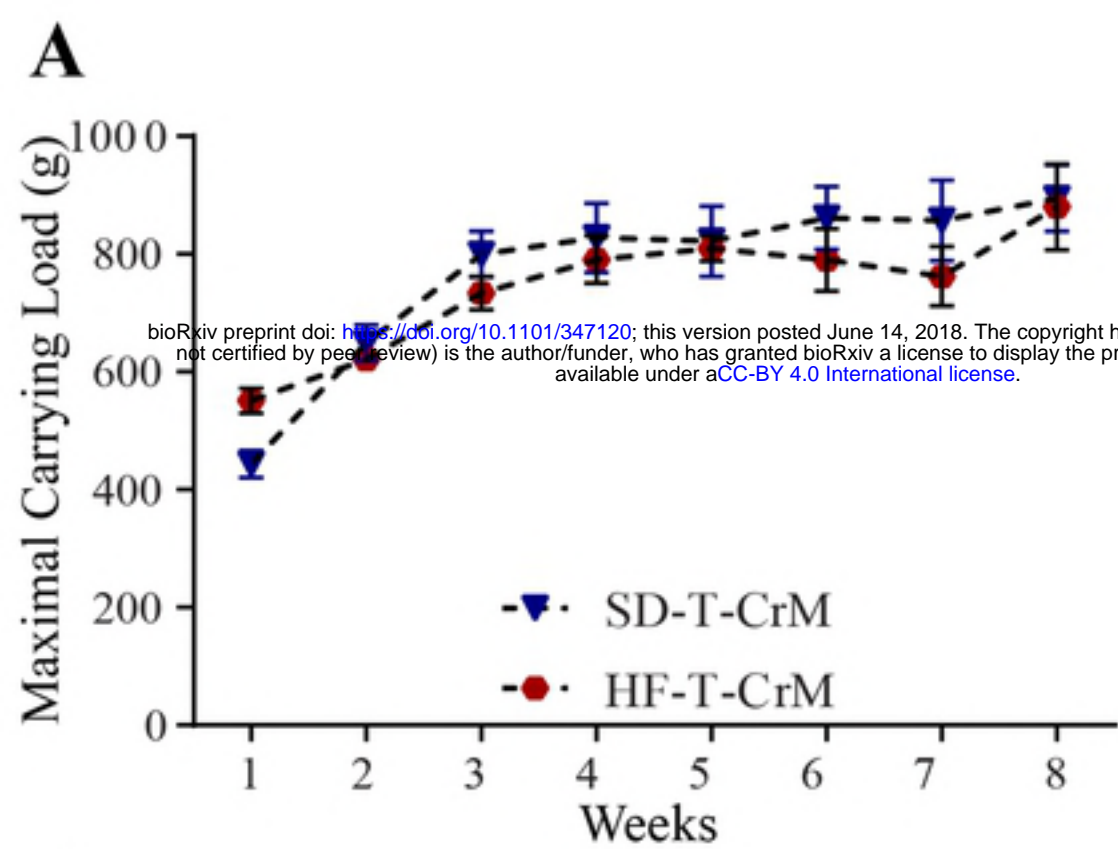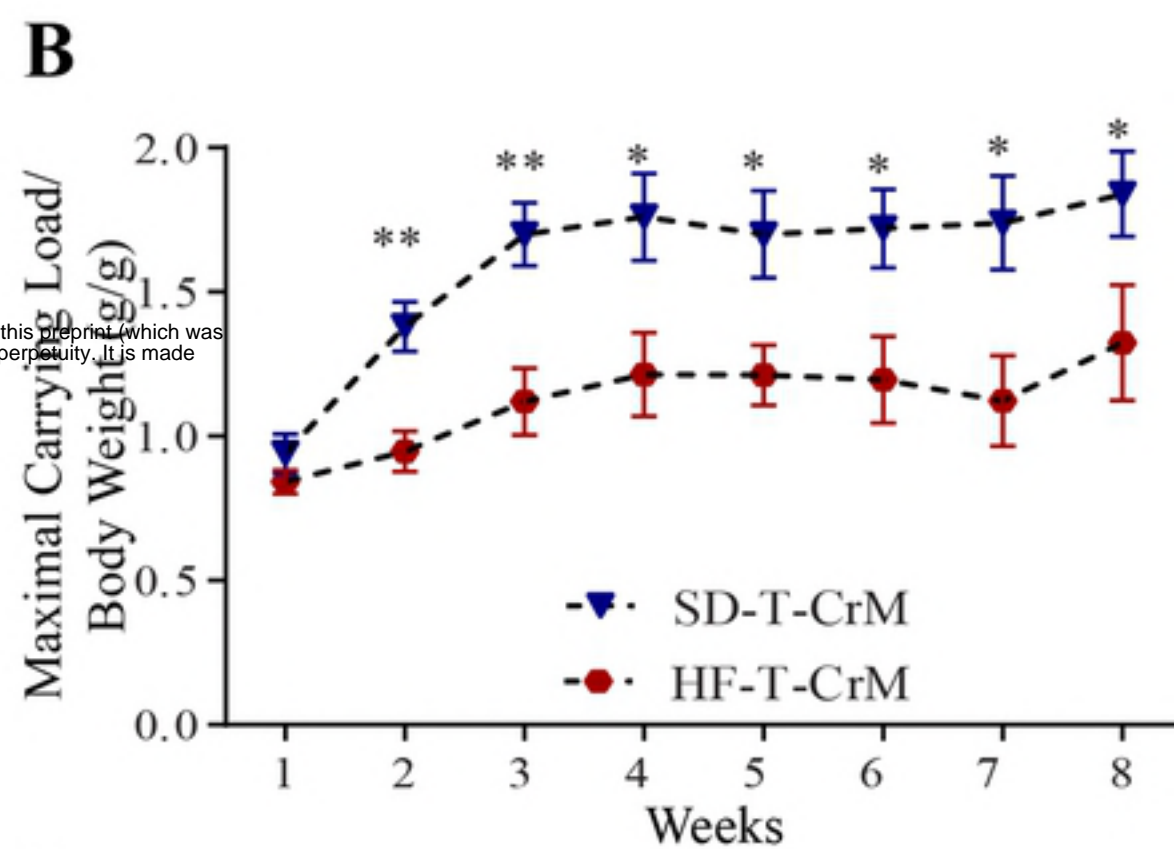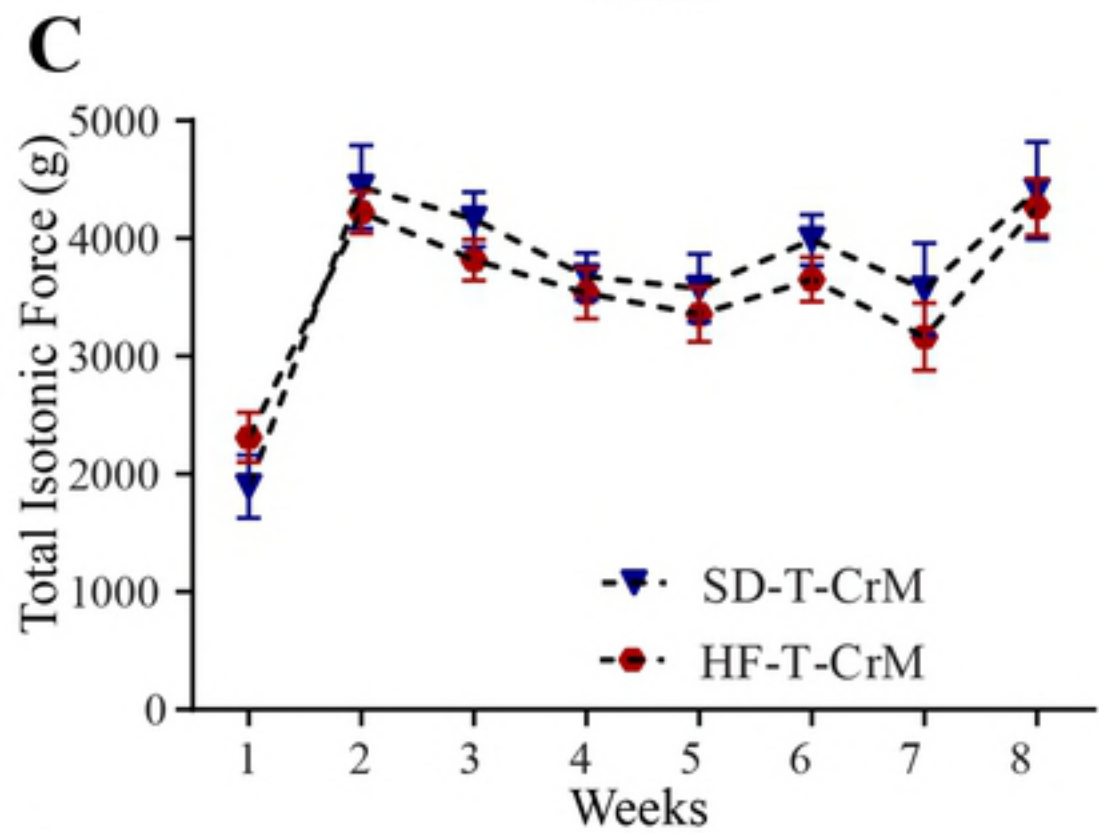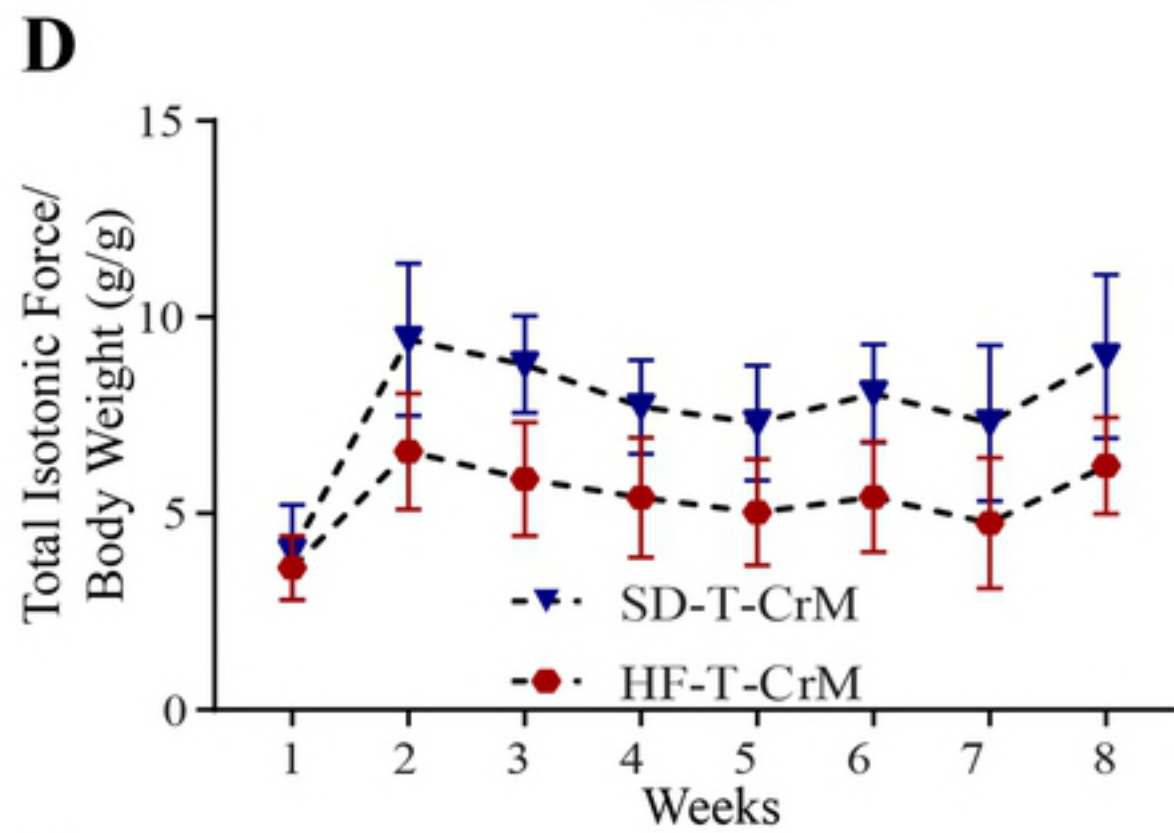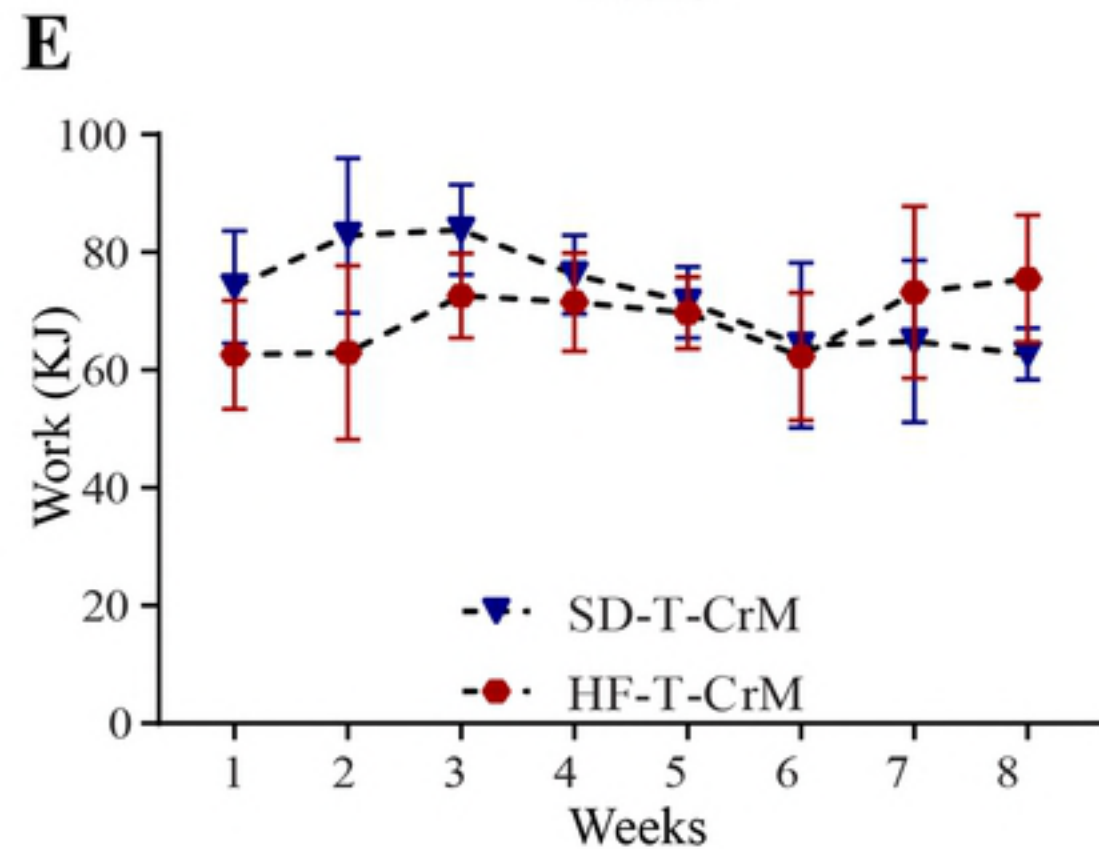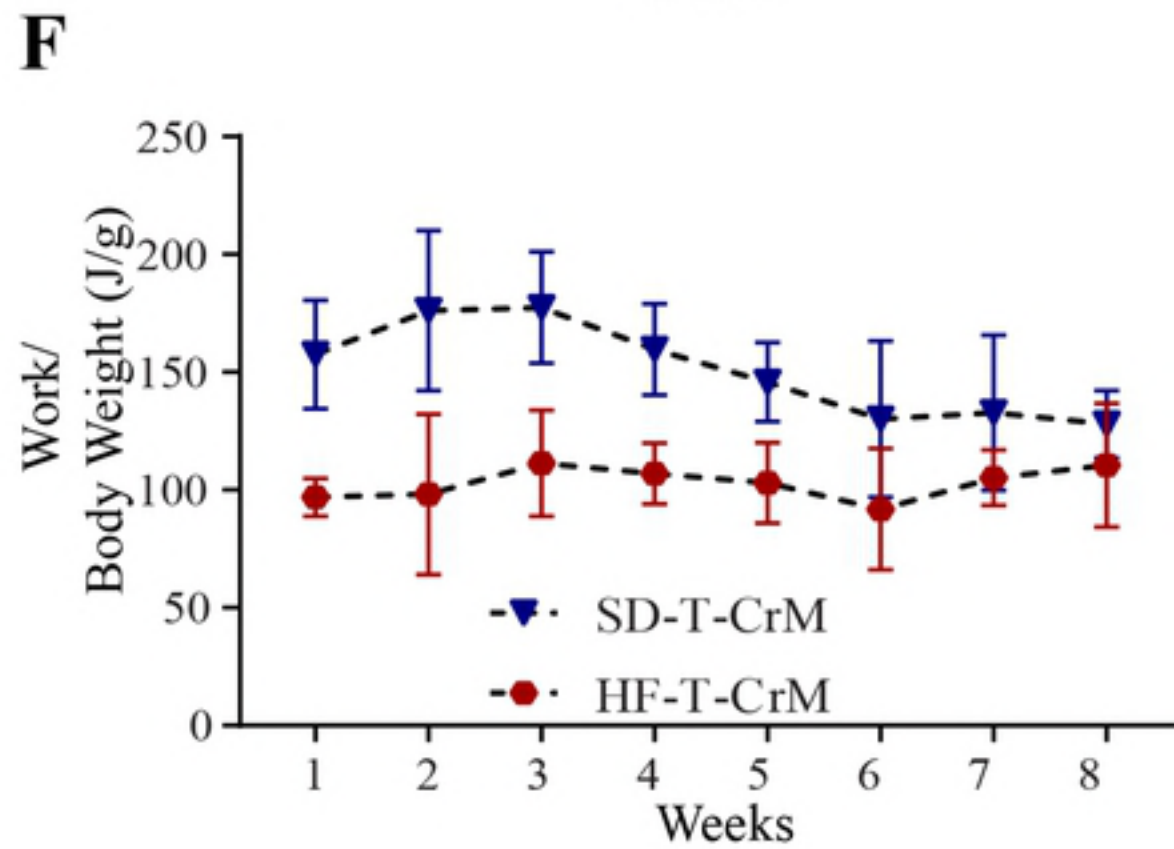

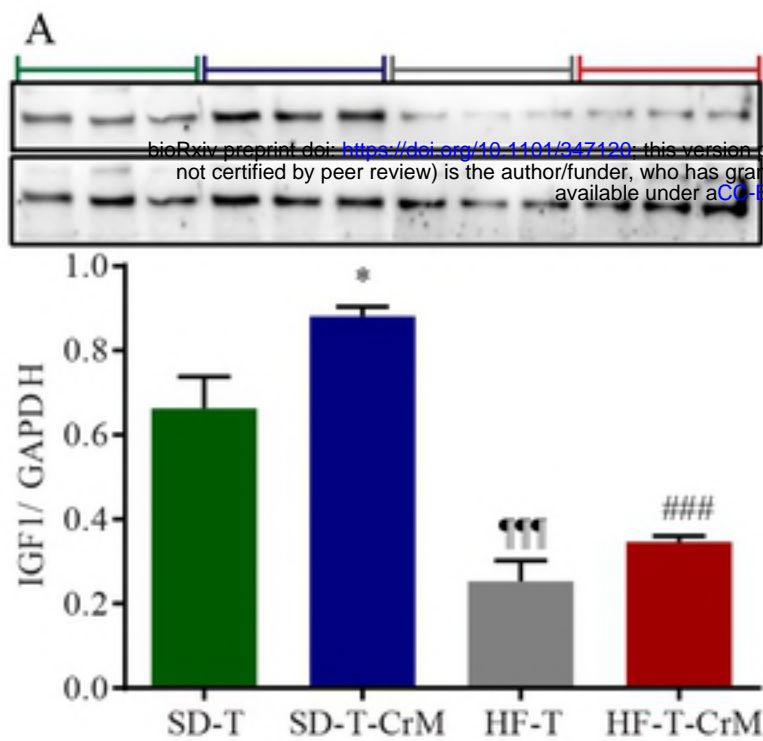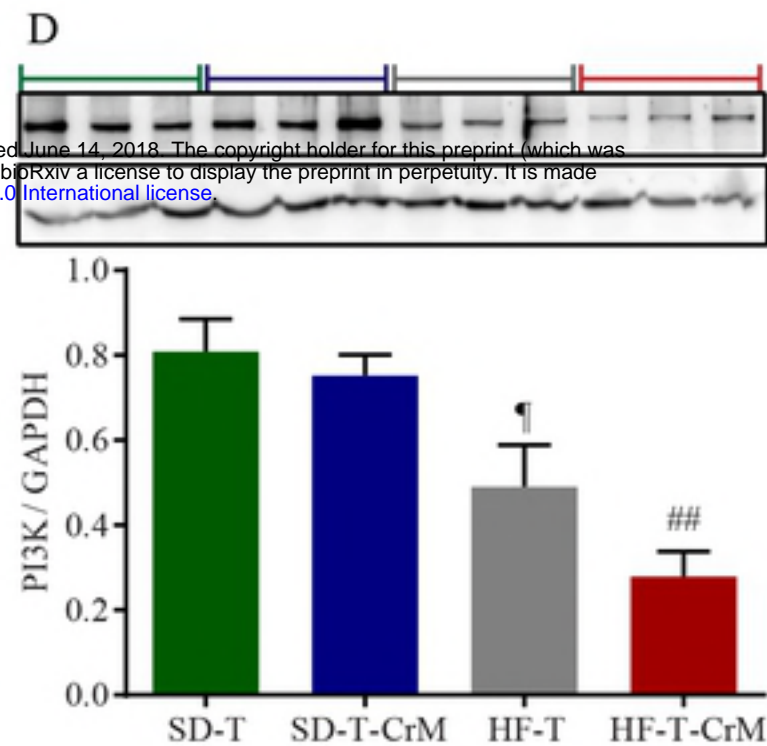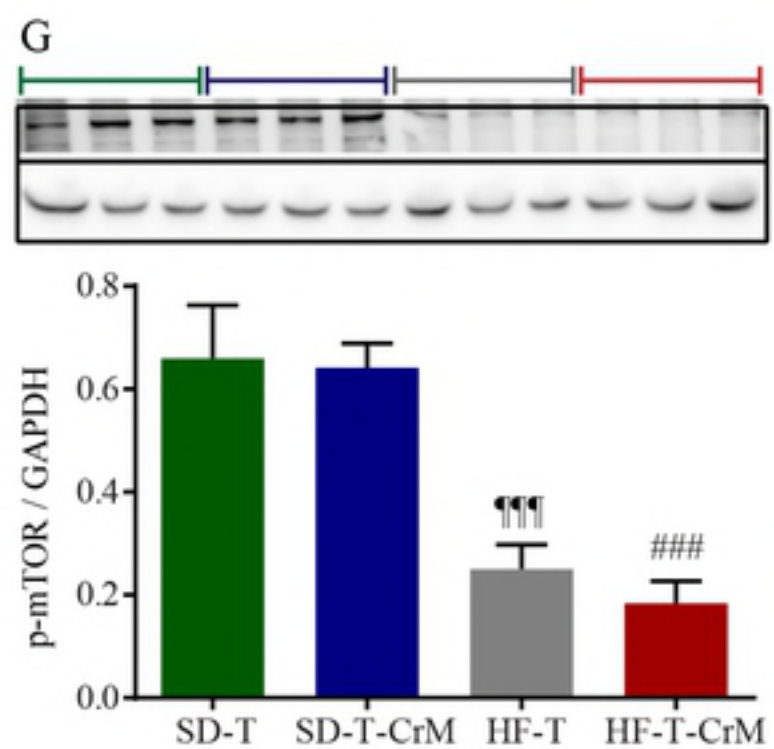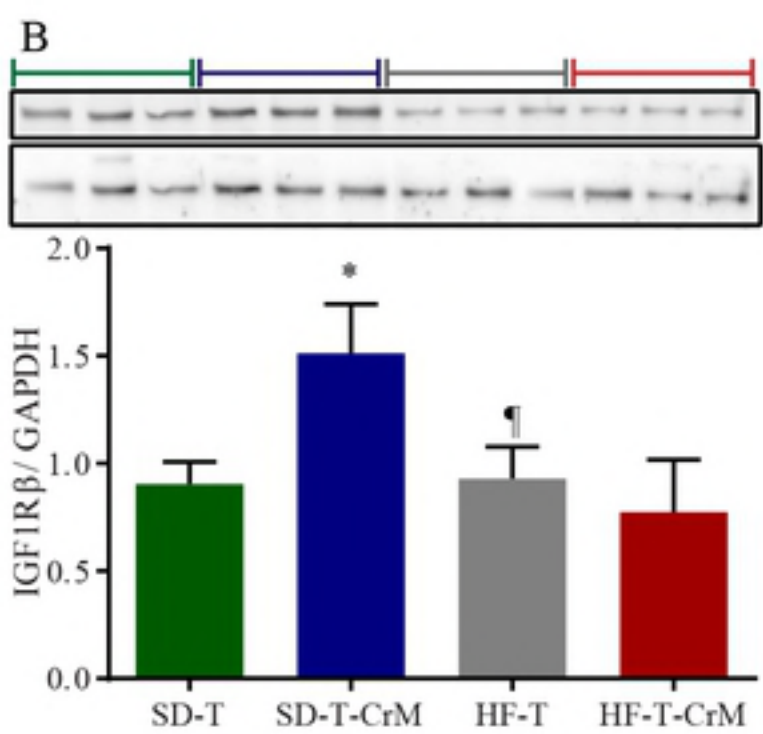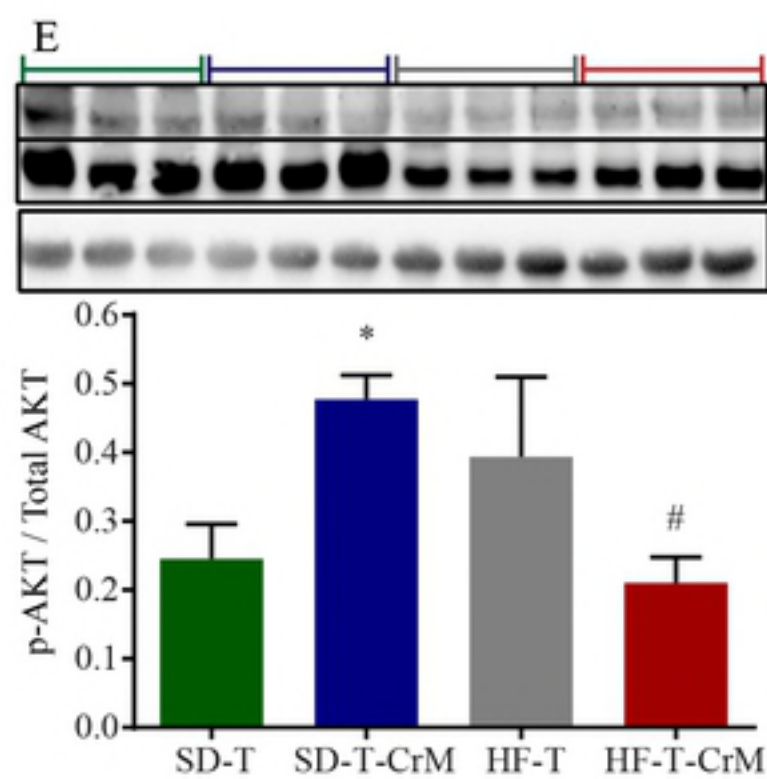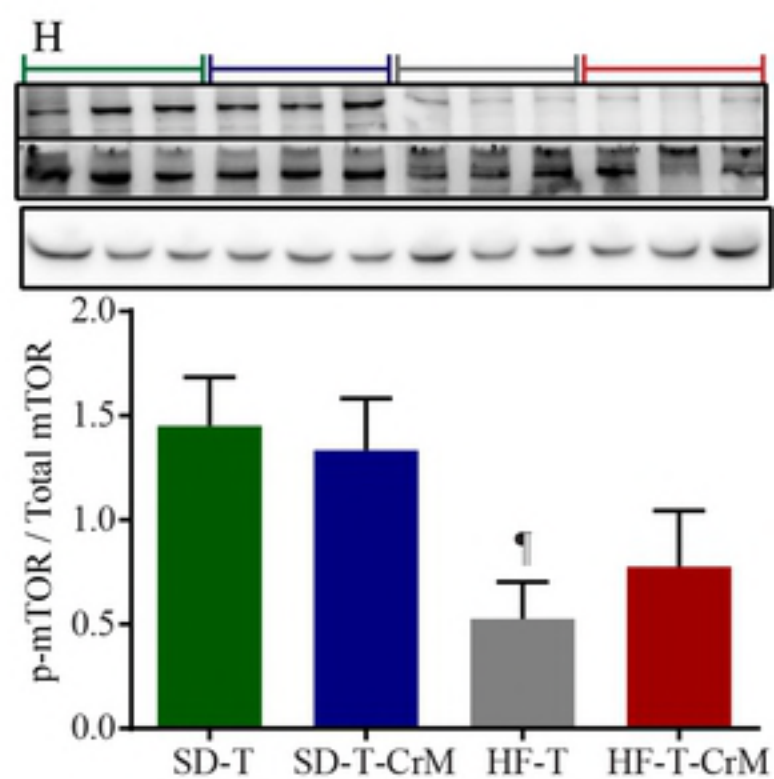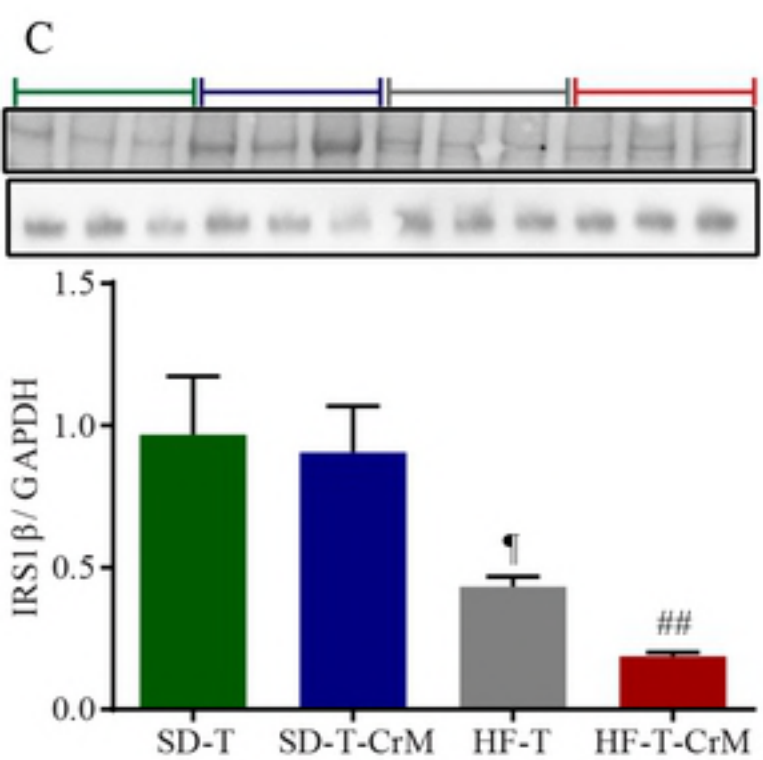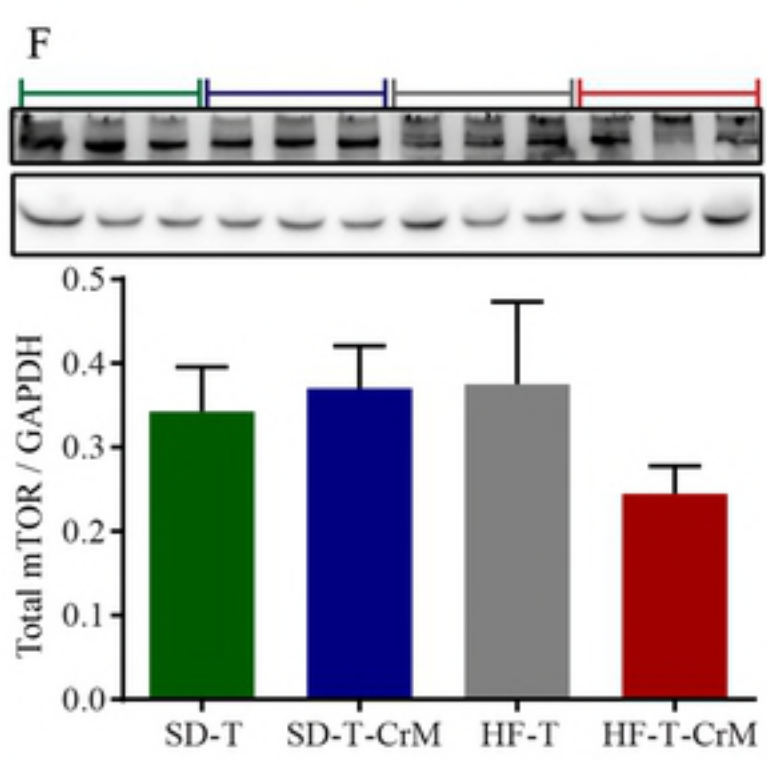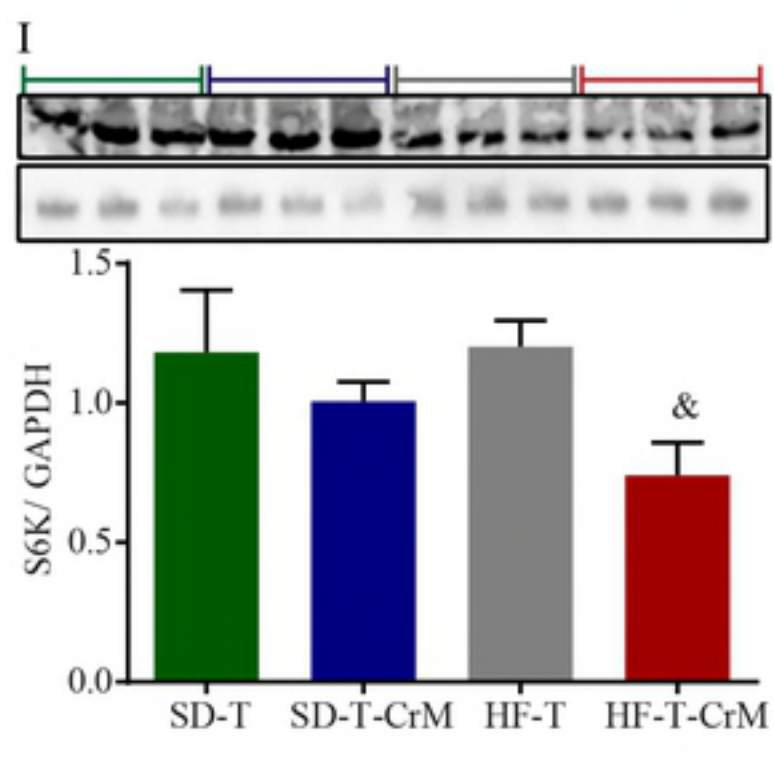

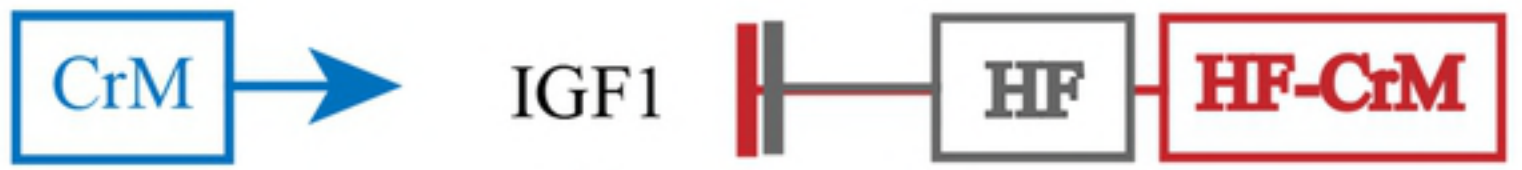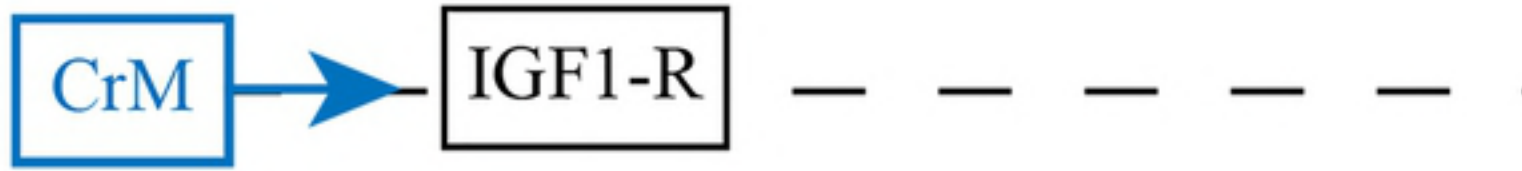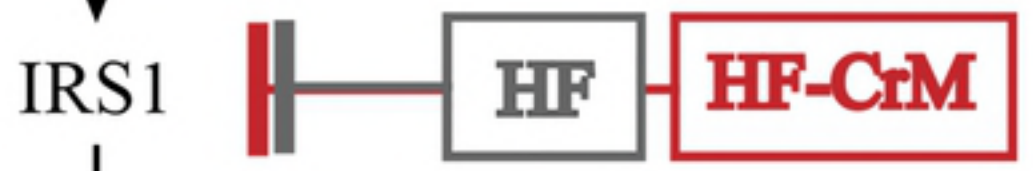

bioRxiv preprint doi: <https://doi.org/10.1101/347120>; this version posted June 14, 2018. The copyright holder for this preprint (which was not certified by peer review) is the author/funder, who has granted bioRxiv a license to display the preprint in perpetuity. It is made available under aCC-BY 4.0 International license.

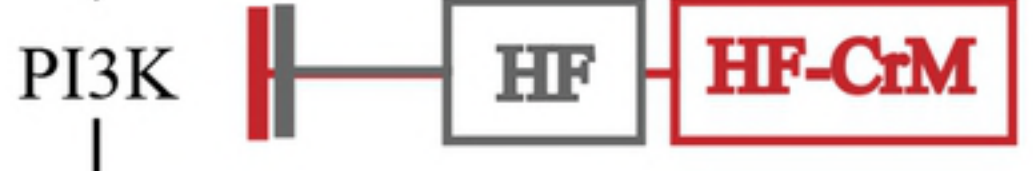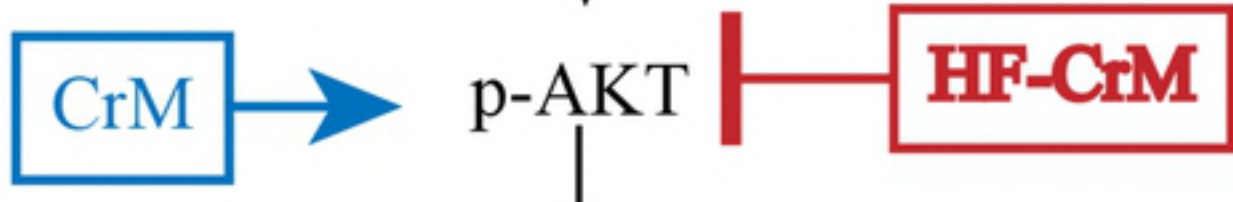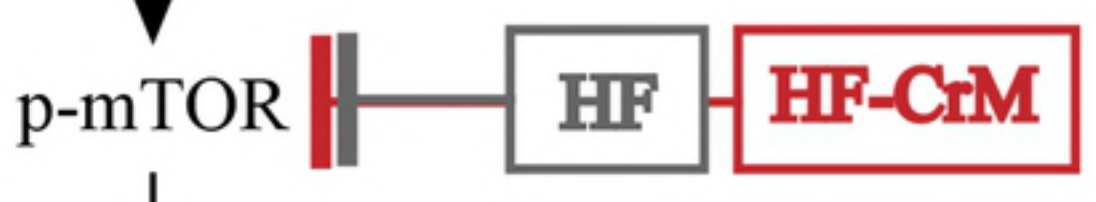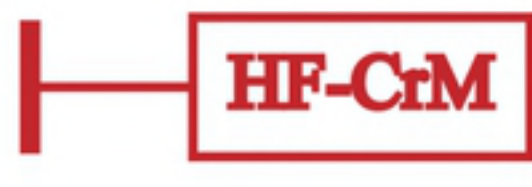

**Protein Synthesis**

**MUSCLE STRENGTH**
